# Supplementary material for: Global distribution of soil organic carbon – Part 2: Certainty of changes related to land use and climate
Source: Copernicus journal article supplement (doi:10.5194/soil-1-367-2015), 2015-04-16
Supplement: Supplementary file 2 [file soil-1-367-2015-supplement.zip]

Archive with 14 entries (11 files):
- Supplementary Material/
- Supplementary Material/SM_5.pdf
- Supplementary Material/SM_2.zip
- Supplementary Material/SM_1.zip
- Supplementary Material/File descriptions.txt
- Supplementary Material/SM_4.pdf
- Supplementary Material/SM_3.pdf
- __MACOSX/
- __MACOSX/Supplementary Material/
- __MACOSX/Supplementary Material/._SM_5.pdf
- __MACOSX/Supplementary Material/._File descriptions.txt
- __MACOSX/Supplementary Material/._SM_4.pdf
- __MACOSX/Supplementary Material/._SM_3.pdf
- soil-1-367-2015-supplement-cover-letter.pdf
