# Supplementary material for: Global distribution of soil organic carbon – Part 2: Certainty of changes related to land use and climate
Source: Copernicus journal article supplement (doi:10.5194/soil-1-367-2015), 2015-04-16
Supplement: Supplementary file 2 [file soil-1-367-2015-supplement.zip › Supplementary Material/File descriptions.txt]

Supplementary material

SM_1. Bayesian Network for the Limited-NPP scenario. To be used with Netica (Norsys, Vancouver, Canada). Readable with any text browser (change the file name tag to '.txt'). 

SM_2. Bayesian Network for the Enhanced-NPP scenario. To be used with Netica (Norsys, Vancouver, Canada). Readable with any text browser (after changing the file name tag to '.txt'). 

SM_3. Data processing, data sources, sensitivity, and agreement with of observed SOC stocks.

SM_4. Additional Tables and Figures.

SM_5. Land use change in individual pixels.
