# Supplementary material for: Global distribution of soil organic carbon – Part 2: Certainty of changes related to land use and climate
Source: Copernicus journal article supplement (doi:10.5194/soil-1-367-2015), 2015-04-16
Supplement: Supplementary file 2 [file soil-1-367-2015-supplement.zip › Supplementary Material/SM_4.pdf]

## Online Resource 4: Additional Tables and Figures

### Vegetation zones and vegetation cover

Table S4.1. Recoding of vegetation types of Sterling and Ducharne (2008), except for tree plantations and wetlands.

| Sterling & Ducharne 2008                                                                                | this paper                        |
|---------------------------------------------------------------------------------------------------------|-----------------------------------|
| Tropical evergreen forest/woodlands                                                                     | Tropical evergreen Forest         |
| Tropical deciduous forest/woodlands                                                                     | Tropical deciduous Forest         |
| Temperate broadleaf evergreen forest/woodlands                                                          | Temperate evergreen Forest        |
| Temperate needleleaf evergreen forest/woodlands                                                         | Temperate evergreen Forest        |
| Temperate deciduous forest/woodlands                                                                    | Temperate deciduous Forest        |
| Boreal evergreen forest/woodlands                                                                       | Boreal forest                     |
| Boreal deciduous forest/woodlands                                                                       | Boreal forest                     |
| Temperate mixed forest/woodlands                                                                        | Temperate mixed forest            |
| Boreal mixed forest/woodlands                                                                           | Boreal forest                     |
| Tropical savanna                                                                                        | Tropical woodland                 |
| Temperate savanna 100% C <sub>3</sub> grass                                                             | Temperate grassland and shrubland |
| Temperate savanna mixed C <sub>3</sub> /C <sub>4</sub> ≈30% C <sub>3</sub> grass                        | Tropical woodland                 |
| Temperate savanna mixed C <sub>3</sub> /C <sub>4</sub> ≈70% C <sub>3</sub> grass                        | Temperate grassland and shrubland |
| C <sub>4</sub> grassland                                                                                | Tropical grassland                |
| C <sub>3</sub> grassland                                                                                | Temperate grassland and shrubland |
| Mixed C <sub>3</sub> /C <sub>4</sub> grassland, ≈30% C <sub>3</sub> grassland                           | Tropical grassland                |
| Mixed C <sub>3</sub> /C <sub>4</sub> grassland ≈70% C <sub>3</sub> grassland                            | Temperate grassland and shrubland |
| Dense shrubland                                                                                         | Shrubland                         |
| Open shrubland                                                                                          | Shrubland                         |
| Tundra                                                                                                  | Tundra                            |
| Desert                                                                                                  | Hot desert                        |
| Polar Desert/Rock/Ice                                                                                   | Bare                              |
| Built-up Land                                                                                           | Azonal: built-up                  |
| Cropland 0% C <sub>3</sub> , 100% C <sub>4</sub>                                                        | Azonal: crops                     |
| Cropland 30% C <sub>3</sub> , 70% C <sub>4</sub>                                                        | Azonal: crops                     |
| Cropland 70% C <sub>3</sub> , 30% C <sub>4</sub>                                                        | Azonal: crops                     |
| Cropland 100% C <sub>3</sub> , 0% C <sub>4</sub>                                                        | Azonal: crops                     |
| Grazing (censored) 0% C <sub>3</sub> , 100% C <sub>4</sub>                                              | Azonal: pasture                   |
| Grazing (censored) 30% C <sub>3</sub> , 70% C <sub>4</sub>                                              | Azonal: pasture                   |
| Grazing (censored) 70% C <sub>3</sub> , 30% C <sub>4</sub>                                              | Azonal: pasture                   |
| Grazing (censored) 100% C <sub>3</sub> , 0% C <sub>4</sub>                                              | Azonal: pasture                   |
| >50% forestry, (Erb et al., 2007)                                                                       | Azonal: plantation                |
| classes 95, 96 Global Ecosystems legend, Global Land Cover Characterization map (Loveland et al., 2000) | Azonal: plantation                |
| swamp forest/flooded forest, coastal wetland, bog/fen/mire, or 50-100% wetland, Lehner & Döll 2004      | Azonal: wetland                   |

### References

- Erb K.-H., Gaube V., Krausmann F., Plutzer C., Bondeau A., Haberl H. (2007) A comprehensive global 5min resolution land-use dataset for the year 2000 consistent with national census data. *Journal of Land Use Science* 2, 191-224. doi: 10.1080/17474230701622981
- Loveland T. R., Reed B. C., Brown J. F., Ohlen D. O., Zhu J., Yang L., Merchant J. W. (2000) Development of a Global Land Cover Characteristics Database and IGBP DISCover from 1-km AVHRR Data. *International Journal of Remote Sensing* 21, 1303-1330. doi: 10.1080/014311600210191

de Noblet-Ducoudré N., Peterschmitt J.-Y. (2008) Designing historical and future land-cover maps at the global scale for climate studies.  
[http://www.cnrm.meteo.fr/ensembles/public/data/LandUseMaps\\_Information.pdf](http://www.cnrm.meteo.fr/ensembles/public/data/LandUseMaps_Information.pdf), ENSEMBLES,  
Sterling S., Ducharne A. (2008) Comprehensive data set of global land cover change for land surface model applications. Global Biogeochemical Cycles 22, GB3017. doi: 10.1029/2007GB002959

**Table S4.2. Probability distribution of plant types within the intersection of land cover and vegetation type.**

| land cover   | vegetation type        | evergr. trees | decid. trees | shrubs | mosses, ferns | gramin-oids | herbs | bare |
|--------------|------------------------|---------------|--------------|--------|---------------|-------------|-------|------|
| zonal        | Trop. evergreen forest | 0.85          | 0.05         | 0.05   | 0.01          | 0           | 0.04  | 0    |
|              | Trop. deciduous forest | 0.05          | 0.85         | 0.05   | 0             | 0           | 0.05  | 0    |
|              | Tropical woodland      | 0             | 0.25         | 0.1    | 0             | 0.5         | 0.1   | 0.05 |
|              | Tropical grassland     | 0             | 0            | 0.05   | 0             | 0.65        | 0.2   | 0.1  |
|              | Hot desert             | 0             | 0            | 0.01   | 0             | 0.02        | 0.01  | 0.96 |
|              | Shrubland              | 0             | 0            | 0.65   | 0             | 0.2         | 0.05  | 0.1  |
|              | Temp. evergr. forest   | 0.85          | 0.05         | 0.06   | 0.02          | 0.01        | 0.01  | 0    |
|              | Temp. decid. forest    | 0.05          | 0.85         | 0.05   | 0.01          | 0.02        | 0.02  | 0    |
|              | Temp. mixed forest     | 0.45          | 0.45         | 0.05   | 0.01          | 0.02        | 0.02  | 0    |
|              | Temp. grassland        | 0             | 0.05         | 0.04   | 0.01          | 0.65        | 0.15  | 0.1  |
|              | Boreal forest          | 0.65          | 0.1          | 0.1    | 0.05          | 0.05        | 0.05  | 0    |
|              | Tundra                 | 0             | 0            | 0.1    | 0.15          | 0.2         | 0.05  | 0.5  |
|              | Bare, ice, rock        | 0             | 0            | 0      | 0             | 0           | 0     | 1    |
| built-up     | all types              | 0             | 0            | 0      | 0             | 0           | 0     | 1    |
| annual crops | Trop. evergreen forest | 0             | 0            | 0      | 0             | 0.7         | 0.3   | 0    |
|              | Trop. deciduous forest | 0             | 0            | 0      | 0             | 0.7         | 0.3   | 0    |
|              | Tropical woodland      | 0             | 0            | 0      | 0             | 0.95        | 0.05  | 0    |
|              | Tropical grassland     | 0             | 0            | 0      | 0             | 0.95        | 0.05  | 0    |
|              | Hot desert             | 0             | 0            | 0      | 0             | 0.95        | 0.05  | 0    |
|              | Shrubland              | 0             | 0            | 0      | 0             | 0.9         | 0.1   | 0    |
|              | Temp. evergr. forest   | 0             | 0            | 0      | 0             | 0.95        | 0.05  | 0    |
|              | Temp. decid. forest    | 0             | 0            | 0      | 0             | 0.95        | 0.05  | 0    |
|              | Temp. mixed forest     | 0             | 0            | 0      | 0             | 0.95        | 0.05  | 0    |
|              | Temp. grassland        | 0             | 0            | 0      | 0             | 0.95        | 0.05  | 0    |
|              | Boreal forest          | 0             | 0            | 0      | 0             | 0.95        | 0.05  | 0    |
|              | Tundra                 | 0             | 0            | 0      | 0             | 0           | 0     | 1    |
|              | Bare, ice, rock        | 0             | 0            | 0      | 0             | 0           | 0     | 1    |
| pasture      | Trop. evergreen forest | 0.01          | 0            | 0.02   | 0             | 0.77        | 0.2   | 0    |
|              | Trop. deciduous forest | 0             | 0.01         | 0.02   | 0             | 0.77        | 0.2   | 0    |
|              | Tropical woodland      | 0             | 0.05         | 0.02   | 0             | 0.73        | 0.2   | 0    |
|              | Tropical grassland     | 0             | 0            | 0.02   | 0             | 0.78        | 0.2   | 0    |
|              | Hot desert             | 0             | 0            | 0      | 0             | 0.8         | 0.2   | 0    |
|              | Shrubland              | 0             | 0            | 0.05   | 0             | 0.8         | 0.15  | 0    |
|              | Temp. evergr. forest   | 0             | 0            | 0      | 0             | 0.8         | 0.2   | 0    |
|              | Temp. decid. forest    | 0             | 0            | 0.01   | 0             | 0.79        | 0.2   | 0    |
|              | Temp. mixed forest     | 0             | 0            | 0.01   | 0             | 0.79        | 0.2   | 0    |
|              | Temp. grassland        | 0             | 0            | 0.01   | 0             | 0.79        | 0.2   | 0    |
|              | Boreal forest          | 0.01          | 0.01         | 0.02   | 0             | 0.76        | 0.2   | 0    |
|              | Tundra                 | 0             | 0            | 0      | 0             | 0.8         | 0.2   | 0    |
|              | Bare, ice, rock        | 0             | 0            | 0      | 0             | 0.8         | 0.2   | 0    |

|                                |                        |      |      |      |       |       |       |       |
|--------------------------------|------------------------|------|------|------|-------|-------|-------|-------|
| plantations, secondary forests | Trop. evergreen forest | 0.75 | 0.1  | 0.05 | 0     | 0     | 0     | 0.1   |
|                                | Trop. deciduous forest | 0.1  | 0.75 | 0.05 | 0     | 0     | 0     | 0.1   |
|                                | Tropical woodland      | 0    | 0.85 | 0.05 | 0     | 0     | 0     | 0.1   |
|                                | Tropical grassland     | 0    | 0.85 | 0.05 | 0     | 0     | 0     | 0.1   |
|                                | Hot desert             | 0    | 0.85 | 0.05 | 0     | 0     | 0     | 0.1   |
|                                | Shrubland              | 0    | 0.85 | 0.05 | 0     | 0     | 0     | 0.1   |
|                                | Temp. evergr. forest   | 0.85 | 0.1  | 0.05 | 0     | 0     | 0     | 0     |
|                                | Temp. decid. forest    | 0.1  | 0.85 | 0.05 | 0     | 0     | 0     | 0     |
|                                | Temp. mixed forest     | 0.1  | 0.85 | 0.05 | 0     | 0     | 0     | 0     |
|                                | Temp. grassland        | 0    | 0.95 | 0.05 | 0     | 0     | 0     | 0     |
|                                | Boreal forest          | 1    | 0    | 0    | 0     | 0     | 0     | 0     |
|                                | Tundra                 | 0.3  | 0.3  | 0    | 0.05  | 0.1   | 0.1   | 0.15  |
|                                | Bare, ice, rock        | 0    | 0    | 0    | 0     | 0     | 0     | 1     |
| wetland                        | Trop. evergreen forest | 0.8  | 0    | 0.08 | 0.02  | 0.06  | 0.04  | 0     |
|                                | Trop. deciduous forest | 0.15 | 0.65 | 0.08 | 0.02  | 0.06  | 0.04  | 0     |
|                                | Tropical woodland      | 0    | 0.2  | 0.05 | 0.1   | 0.45  | 0.2   | 0     |
|                                | Tropical grassland     | 0    | 0.25 | 0.05 | 0.2   | 0.3   | 0.2   | 0     |
|                                | Hot desert             | 0.03 | 0.03 | 0.09 | 0.2   | 0.45  | 0.2   | 0     |
|                                | Shrubland              | 0    | 0.05 | 0.35 | 0.1   | 0.3   | 0.2   | 0     |
|                                | Temp. evergr. forest   | 0.02 | 0    | 0.05 | 0.2   | 0.43  | 0.3   | 0     |
|                                | Temp. decid. forest    | 0    | 0.15 | 0.05 | 0.15  | 0.4   | 0.25  | 0     |
|                                | Temp. mixed forest     | 0.02 | 0.14 | 0.04 | 0.2   | 0.35  | 0.25  | 0     |
|                                | Temp. grassland        | 0    | 0.25 | 0.1  | 0.1   | 0.3   | 0.25  | 0     |
|                                | Boreal forest          | 0.25 | 0.1  | 0.05 | 0.1   | 0.3   | 0.2   | 0     |
|                                | Tundra                 | 0    | 0    | 0.4  | 0.2   | 0.15  | 0.15  | 0.1   |
|                                | Bare, ice, rock        | 0    | 0    | 0    | 0.001 | 0.001 | 0.001 | 0.997 |

Table S4.3. Probabilities of target land use contingent on reference land use (LU), target temperature and target aridity. Transition among crops, pastures, and other vegetation was initially calculated from ENSEMBLES maps (de Noblet-Ducoudré and Peterschmitt, 2008). These transition probabilities were modified and extended using these rules in the given order:

- when temperature = (freezing, cold, or cool) & no LUC observed, then zonal → plantation: 10%, any LU → zonal: 90%
- when temperature = (warm or hot), then plantations → crop, → pasture, → zonal: 1% each
- when temperature = (warm or hot) & aridity = (arid or dry), then wetlands → crop, → pasture: 1% each
- when temperature = (warm or hot) & aridity = (mesic or moist) [i.e., tropics], then (anything but built-up) → (any LU but wetland): at least 1%
- when temperature ≠ freezing & aridity ≠ arid [i.e., temperate and boreal], then (any LU but built-up) to any LU: at least 1% (but: zonal → wetland: 0)
- when temperature ≠ (freezing or cold), then zonal → pasture: at least 1%
- when temperature = (warm or hot), then zonal → crop: at least 1% and any LU → built-up: 1%

de Noblet-Ducoudré N., Peterschmitt J.-Y. (2008) Designing historical and future land-cover maps at the global scale for climate studies.

[http://www.cnrm.meteo.fr/ensembles/public/data/LandUseMaps\\_Information.pdf](http://www.cnrm.meteo.fr/ensembles/public/data/LandUseMaps_Information.pdf)

| reference<br>land use | temp.  | aridity | target land use |          |       |         |            |         |
|-----------------------|--------|---------|-----------------|----------|-------|---------|------------|---------|
|                       |        |         | zonal           | built-up | crops | pasture | plantation | wetland |
| zonal                 | freez. | arid    | 1               | 0        | 0     | 0       | 0          | 0       |
|                       |        | dry     | 0.9             | 0        | 0     | 0       | 0.1        | 0       |
|                       |        | mesic   | 0.899           | 0        | 0     | 0       | 0.1        | 0.001   |
|                       |        | moist   | 0.899           | 0        | 0     | 0       | 0.1        | 0.001   |
|                       |        | arid    | 0.98            | 0        | 0.02  | 0       | 0          | 0       |
|                       |        | dry     | 0.9             | 0        | 0     | 0       | 0.1        | 0       |
|                       |        | mesic   | 0.869           | 0        | 0.03  | 0       | 0.1        | 0.001   |
|                       |        | moist   | 0.759           | 0        | 0.14  | 0       | 0.1        | 0.001   |
|                       | cold   | arid    | 0.76            | 0        | 0.18  | 0.06    | 0          | 0       |
|                       |        | dry     | 0.67            | 0        | 0.2   | 0.03    | 0.1        | 0       |
|                       |        | mesic   | 0.66            | 0        | 0.23  | 0.01    | 0.1        | 0       |
|                       |        | moist   | 0.86            | 0        | 0.03  | 0.01    | 0.1        | 0       |
|                       | cool   | arid    | 0.87            | 0        | 0.11  | 0.01    | 0.01       | 0       |
|                       |        | dry     | 0.74            | 0        | 0.15  | 0.01    | 0.1        | 0       |
|                       |        | mesic   | 0.72            | 0.01     | 0.16  | 0.01    | 0.1        | 0       |
|                       |        | moist   | 0.73            | 0.01     | 0.15  | 0.01    | 0.1        | 0       |
|                       | warm   | arid    | 0.97            | 0        | 0.01  | 0.01    | 0.01       | 0       |
|                       |        | dry     | 0.87            | 0        | 0.02  | 0.01    | 0.1        | 0       |
|                       |        | mesic   | 0.66            | 0.01     | 0.22  | 0.01    | 0.1        | 0       |
|                       |        | moist   | 0.74            | 0.01     | 0.14  | 0.01    | 0.1        | 0       |
|                       | hot    | arid    | 0.97            | 0        | 0.01  | 0.01    | 0.01       | 0       |
|                       |        | dry     | 0.87            | 0        | 0.02  | 0.01    | 0.1        | 0       |
|                       |        | mesic   | 0.66            | 0.01     | 0.22  | 0.01    | 0.1        | 0       |
|                       |        | moist   | 0.74            | 0.01     | 0.14  | 0.01    | 0.1        | 0       |

|          |        |       |       |       |       |      |      |       |
|----------|--------|-------|-------|-------|-------|------|------|-------|
| built-up | freez. | arid  | 0     | 1     | 0     | 0    | 0    | 0     |
|          |        | dry   | 0     | 1     | 0     | 0    | 0    | 0     |
|          |        | mesic | 0     | 1     | 0     | 0    | 0    | 0     |
|          |        | moist | 0     | 1     | 0     | 0    | 0    | 0     |
|          | cold   | arid  | 0     | 1     | 0     | 0    | 0    | 0     |
|          |        | dry   | 0     | 1     | 0     | 0    | 0    | 0     |
|          |        | mesic | 0     | 1     | 0     | 0    | 0    | 0     |
|          |        | moist | 0     | 1     | 0     | 0    | 0    | 0     |
|          | cool   | arid  | 0     | 1     | 0     | 0    | 0    | 0     |
|          |        | dry   | 0     | 1     | 0     | 0    | 0    | 0     |
|          |        | mesic | 0     | 1     | 0     | 0    | 0    | 0     |
|          |        | moist | 0     | 1     | 0     | 0    | 0    | 0     |
|          | warm   | arid  | 0     | 1     | 0     | 0    | 0    | 0     |
|          |        | dry   | 0     | 1     | 0     | 0    | 0    | 0     |
|          |        | mesic | 0     | 1     | 0     | 0    | 0    | 0     |
|          |        | moist | 0     | 1     | 0     | 0    | 0    | 0     |
|          | hot    | arid  | 0     | 1     | 0     | 0    | 0    | 0     |
|          |        | dry   | 0     | 1     | 0     | 0    | 0    | 0     |
|          |        | mesic | 0     | 1     | 0     | 0    | 0    | 0     |
|          |        | moist | 0     | 1     | 0     | 0    | 0    | 0     |
| crops    | freez. | arid  | 0.01  | 0     | 0.98  | 0.01 | 0    | 0     |
|          |        | dry   | 0.01  | 0     | 0.98  | 0.01 | 0    | 0     |
|          |        | mesic | 0.039 | 0     | 0.96  | 0    | 0    | 0.001 |
|          |        | moist | 0.149 | 0     | 0.85  | 0    | 0    | 0.001 |
|          | cold   | arid  | 0     | 0     | 1     | 0    | 0    | 0     |
|          |        | dry   | 0     | 0     | 1     | 0    | 0    | 0     |
|          |        | mesic | 0     | 0     | 0.999 | 0    | 0    | 0.001 |
|          |        | moist | 0     | 0     | 0.999 | 0    | 0    | 0.001 |
|          | cool   | arid  | 0     | 0.001 | 0.999 | 0    | 0    | 0     |
|          |        | dry   | 0     | 0.001 | 0.999 | 0    | 0    | 0     |
|          |        | mesic | 0     | 0.001 | 0.998 | 0    | 0    | 0.001 |
|          |        | moist | 0     | 0.001 | 0.998 | 0    | 0    | 0.001 |
|          | warm   | arid  | 0.05  | 0.001 | 0.899 | 0    | 0.05 | 0     |
|          |        | dry   | 0.06  | 0.001 | 0.889 | 0    | 0.05 | 0     |
|          |        | mesic | 0.138 | 0.001 | 0.84  | 0.01 | 0.01 | 0.001 |
|          |        | moist | 0.188 | 0.001 | 0.79  | 0.01 | 0.01 | 0.001 |
|          | hot    | arid  | 0.089 | 0.001 | 0.86  | 0    | 0.05 | 0     |
|          |        | dry   | 0.019 | 0.001 | 0.93  | 0    | 0.05 | 0     |
|          |        | mesic | 0.118 | 0.001 | 0.86  | 0.01 | 0.01 | 0.001 |
|          |        | moist | 0.048 | 0.001 | 0.93  | 0.01 | 0.01 | 0.001 |

|            |        |       |      |       |      |       |       |       |
|------------|--------|-------|------|-------|------|-------|-------|-------|
| pasture    | freez. | arid  | 0.2  | 0     | 0    | 0.8   | 0     | 0     |
|            |        | dry   | 0.1  | 0     | 0    | 0.9   | 0     | 0     |
|            |        | mesic | 0    | 0     | 0    | 0.999 | 0     | 0.001 |
|            |        | moist | 0    | 0     | 0    | 0.999 | 0     | 0.001 |
|            | cold   | arid  | 0.1  | 0.01  | 0    | 0.89  | 0     | 0     |
|            |        | dry   | 0    | 0     | 0    | 1     | 0     | 0     |
|            |        | mesic | 0    | 0     | 0    | 0.999 | 0     | 0.001 |
|            |        | moist | 0    | 0     | 0    | 0.999 | 0     | 0.001 |
|            | cool   | arid  | 0    | 0.001 | 0    | 0.999 | 0     | 0     |
|            |        | dry   | 0    | 0.001 | 0.05 | 0.949 | 0     | 0     |
|            |        | mesic | 0.01 | 0.001 | 0.1  | 0.838 | 0.05  | 0.001 |
|            |        | moist | 0.01 | 0.001 | 0.2  | 0.738 | 0.05  | 0.001 |
|            | warm   | arid  | 0    | 0.001 | 0.01 | 0.989 | 0     | 0     |
|            |        | dry   | 0    | 0.001 | 0.02 | 0.979 | 0     | 0     |
|            |        | mesic | 0.01 | 0.001 | 0.2  | 0.738 | 0.05  | 0.001 |
|            |        | moist | 0.01 | 0.001 | 0.2  | 0.738 | 0.05  | 0.001 |
|            | hot    | arid  | 0    | 0.001 | 0.01 | 0.979 | 0.01  | 0     |
|            |        | dry   | 0    | 0.001 | 0.02 | 0.969 | 0.01  | 0     |
|            |        | mesic | 0.01 | 0.001 | 0.2  | 0.738 | 0.05  | 0.001 |
|            |        | moist | 0.01 | 0.001 | 0.2  | 0.738 | 0.05  | 0.001 |
| plantation | freez. | arid  | 0.01 | 0     | 0    | 0.01  | 0.98  | 0     |
|            |        | dry   | 0.01 | 0     | 0    | 0.01  | 0.98  | 0     |
|            |        | mesic | 0.01 | 0     | 0    | 0.01  | 0.979 | 0.001 |
|            |        | moist | 0.01 | 0     | 0    | 0.01  | 0.979 | 0.001 |
|            | cold   | arid  | 0.01 | 0     | 0    | 0.01  | 0.98  | 0     |
|            |        | dry   | 0.01 | 0     | 0    | 0.01  | 0.98  | 0     |
|            |        | mesic | 0.01 | 0     | 0.01 | 0.01  | 0.969 | 0.001 |
|            |        | moist | 0.01 | 0     | 0.01 | 0.01  | 0.969 | 0.001 |
|            | cool   | arid  | 0.01 | 0.001 | 0.01 | 0.01  | 0.969 | 0     |
|            |        | dry   | 0.01 | 0.001 | 0.01 | 0.01  | 0.969 | 0     |
|            |        | mesic | 0.01 | 0.001 | 0.01 | 0.01  | 0.968 | 0.001 |
|            |        | moist | 0.01 | 0.001 | 0.01 | 0.01  | 0.968 | 0.001 |
|            | warm   | arid  | 0.01 | 0.001 | 0.01 | 0.01  | 0.969 | 0     |
|            |        | dry   | 0.01 | 0.001 | 0.01 | 0.01  | 0.969 | 0     |
|            |        | mesic | 0.01 | 0.001 | 0.01 | 0.01  | 0.968 | 0.001 |
|            |        | moist | 0.01 | 0.001 | 0.01 | 0.01  | 0.968 | 0.001 |
|            | hot    | arid  | 0.01 | 0.001 | 0.01 | 0.01  | 0.969 | 0     |
|            |        | dry   | 0.01 | 0.001 | 0.01 | 0.01  | 0.969 | 0     |
|            |        | mesic | 0.01 | 0.001 | 0.01 | 0.01  | 0.968 | 0.001 |
|            |        | moist | 0.01 | 0.001 | 0.01 | 0.01  | 0.968 | 0.001 |

|         |        |       |   |   |      |      |      |      |
|---------|--------|-------|---|---|------|------|------|------|
| wetland | freez. | arid  | 0 | 0 | 0    | 0    | 0    | 1    |
|         |        | dry   | 0 | 0 | 0    | 0    | 0    | 1    |
|         |        | mesic | 0 | 0 | 0    | 0    | 0    | 1    |
|         |        | moist | 0 | 0 | 0    | 0    | 0    | 1    |
|         | cold   | arid  | 0 | 0 | 0    | 0    | 0.01 | 0.99 |
|         |        | dry   | 0 | 0 | 0    | 0    | 0.01 | 0.99 |
|         |        | mesic | 0 | 0 | 0    | 0    | 0.01 | 0.99 |
|         |        | moist | 0 | 0 | 0    | 0    | 0.01 | 0.99 |
|         | cool   | arid  | 0 | 0 | 0.01 | 0.01 | 0.01 | 0.97 |
|         |        | dry   | 0 | 0 | 0.01 | 0.01 | 0.01 | 0.97 |
|         |        | mesic | 0 | 0 | 0.01 | 0.01 | 0.01 | 0.97 |
|         |        | moist | 0 | 0 | 0.01 | 0.01 | 0.01 | 0.97 |
|         | warm   | arid  | 0 | 0 | 0.01 | 0.01 | 0.01 | 0.97 |
|         |        | dry   | 0 | 0 | 0.01 | 0.01 | 0.01 | 0.97 |
|         |        | mesic | 0 | 0 | 0.01 | 0.01 | 0.01 | 0.97 |
|         |        | moist | 0 | 0 | 0.01 | 0.01 | 0.01 | 0.97 |
|         | hot    | arid  | 0 | 0 | 0.01 | 0.01 | 0.01 | 0.97 |
|         |        | dry   | 0 | 0 | 0.01 | 0.01 | 0.01 | 0.97 |
|         |        | mesic | 0 | 0 | 0.01 | 0.01 | 0.01 | 0.97 |
|         |        | moist | 0 | 0 | 0.01 | 0.01 | 0.01 | 0.97 |

## Decomposability

Table S4.4. Fraction (%) of the litter (above- and belowground) of a plant type belonging to a decomposability class.

| plant types     | decomposability |     |        |      |           |
|-----------------|-----------------|-----|--------|------|-----------|
|                 | very low        | low | medium | high | very high |
| evergreen trees | 35              | 15  | 40     | 10   |           |
| deciduous trees | 30              | 20  |        | 40   | 10        |
| shrubs          | 10              | 15  | 5      | 45   | 25        |
| mosses, ferns   |                 | 60  | 40     |      |           |
| graminoids      |                 |     | 80     | 20   |           |
| herbs           |                 |     |        | 80   | 20        |
| bare            | 20              | 20  | 20     | 20   | 20        |

Table S4.5. Probability (%) of a fraction of a class of organic matter of a certain decomposability class going to the slow pool.

| fraction of decomposability class going to slow pool | decomposability |      |        |      |           |
|------------------------------------------------------|-----------------|------|--------|------|-----------|
|                                                      | very low        | low  | medium | high | very high |
| 0.0–0.10                                             |                 |      |        | 2.5  | 97.5      |
| 0.10–0.35                                            |                 |      | 0.5    | 95.0 | 2.5       |
| 0.35–0.65                                            |                 | 2.5  | 99.0   | 2.5  |           |
| 0.65–0.9                                             | 2.5             | 95.0 | 0.5    |      |           |
| 0.90–1.0                                             | 97.5            | 2.5  |        |      |           |

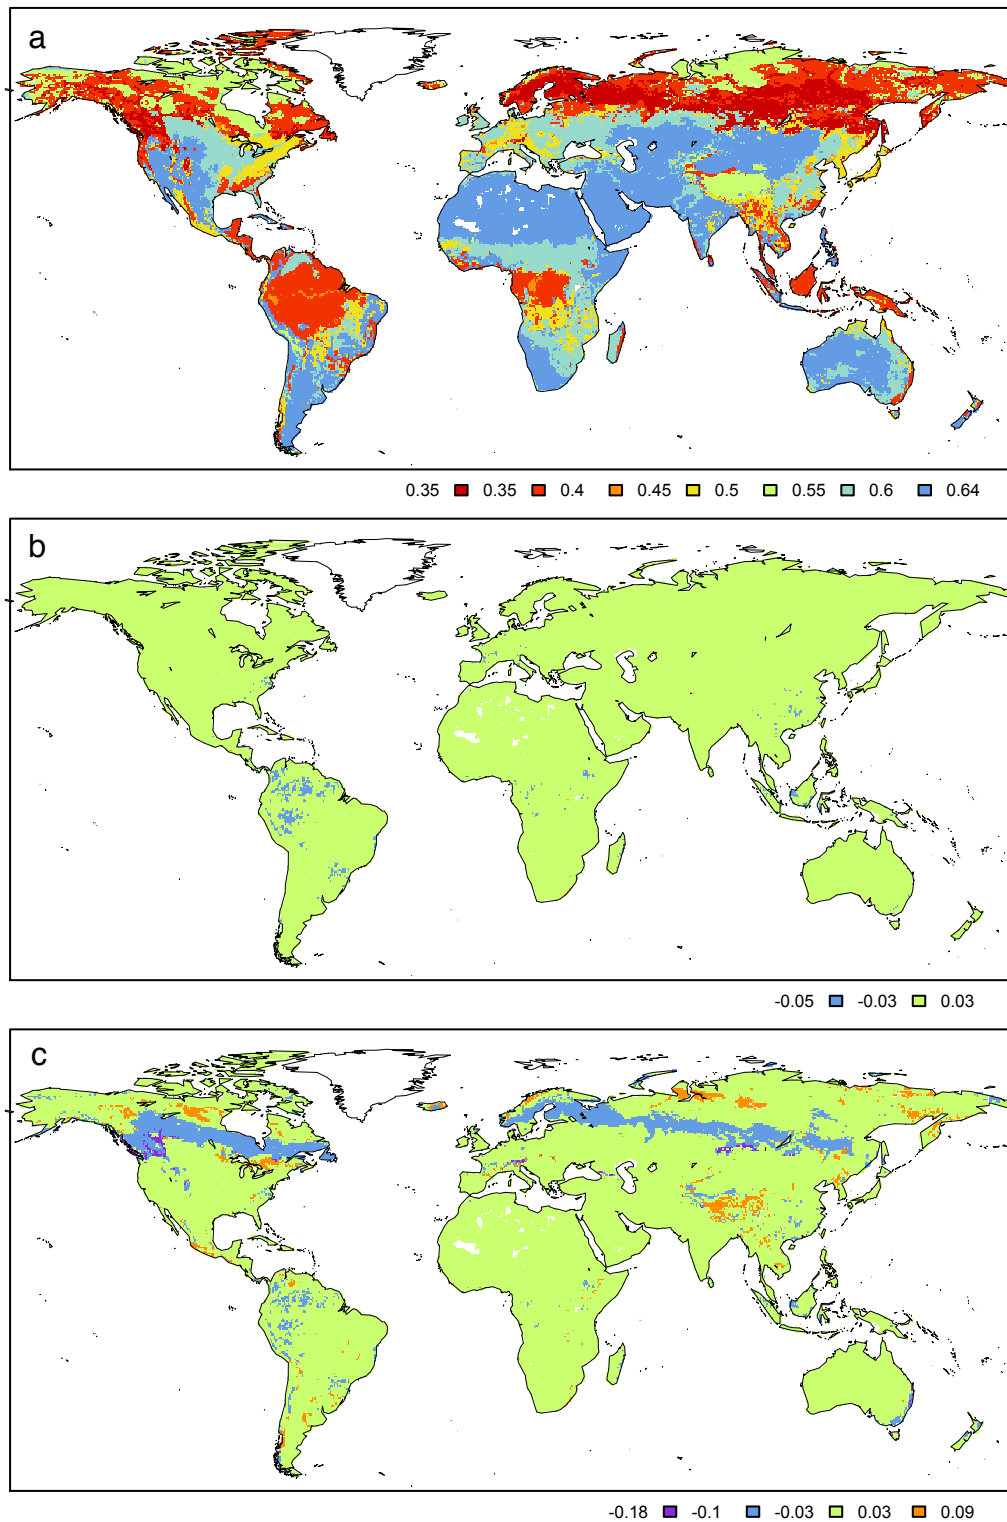

Fig. S4.1. Distribution of mean decomposability (dimensionless) of above- and belowground litter (a) under reference conditions and (b) difference in decomposability to target conditions under the NPP-limited scenario and (c) difference in decomposability to target conditions under the NPP-enhanced scenario.

## Depth of water table

Table S4.6. Probabilities of the water table being in certain ranges of depth (equal to the fraction of water-logged soil) depending on land cover.

| land cover | depth of water table |           |            |      |
|------------|----------------------|-----------|------------|------|
|            | 0 to <10             | 10 to <20 | 20 to <100 | ≥100 |
| zonal      | 0                    | 0         | 0.05       | 0.95 |
| built-up   | 0                    | 0         | 0.01       | 0.99 |
| crops      | 0                    | 0         | 0.01       | 0.99 |
| pasture    | 0                    | 0         | 0.05       | 0.95 |
| plantation | 0                    | 0         | 0.02       | 0.98 |
| wetland    | 0.80                 | 0.15      | 0.05       | 0    |

## Distribution of SOC stocks

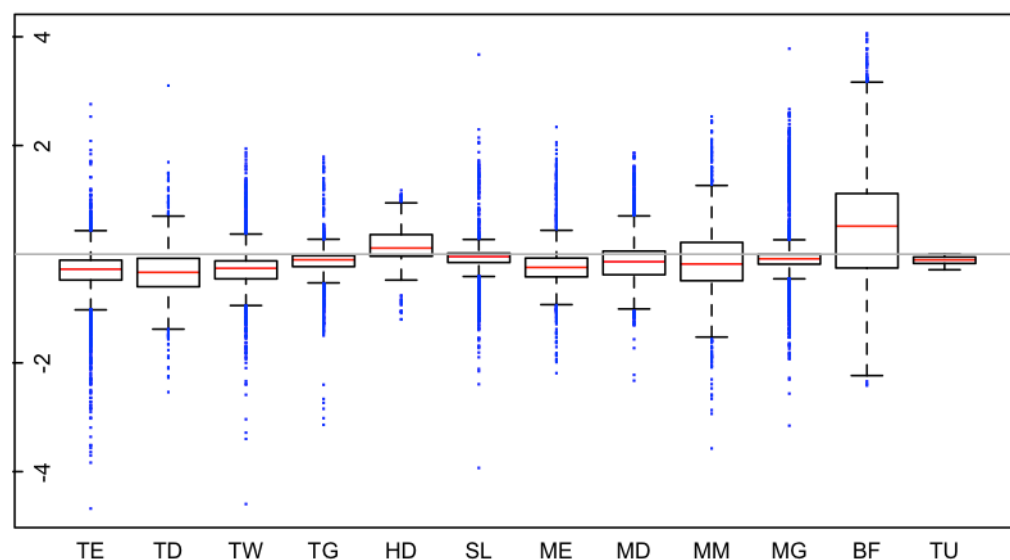

|                                            | TE    | TD    | TW    | TG    | HD    | SL    | ME    | MD    | MM    | MG    | BF    | TU    |
|--------------------------------------------|-------|-------|-------|-------|-------|-------|-------|-------|-------|-------|-------|-------|
| Q1-1.5·(Q3-Q1)                             | -1.02 | -1.38 | -0.94 | -0.53 | -0.48 | -0.41 | -0.93 | -1.01 | -1.52 | -0.45 | -2.23 | -0.29 |
| 25%ile (Q1)                                | -0.48 | -0.60 | -0.45 | -0.23 | -0.04 | -0.15 | -0.42 | -0.38 | -0.49 | -0.18 | -0.25 | -0.17 |
| Median                                     | -0.28 | -0.33 | -0.26 | -0.10 | 0.11  | -0.04 | -0.24 | -0.14 | -0.18 | -0.08 | 0.52  | -0.11 |
| 75%ile (Q3)                                | -0.11 | -0.08 | -0.12 | -0.03 | 0.36  | 0.02  | -0.07 | 0.06  | 0.22  | 0.00  | 1.12  | -0.05 |
| Q3+1.5·(Q3-Q1)                             | 0.43  | 0.70  | 0.37  | 0.27  | 0.94  | 0.27  | 0.44  | 0.70  | 1.26  | 0.26  | 3.17  | 0.00  |
| soil area, 10 <sup>6</sup> km <sup>2</sup> | 16.4  | 5.7   | 14.5  | 6.2   | 9.2   | 14.0  | 4.5   | 4.8   | 4.5   | 12.1  | 17.8  | 6.2   |

Fig. S4.2. Distribution of (means per pixel of) changes in SOC stocks (kg C/m<sup>2</sup>, P>0.5) within vegetation zones in the NPP-limited scenario. TE: tropical evergreen forest, TD: tropical deciduous forest, TW: tropical woodland, TG: tropical grassland, HD: hot deserts, SL: shrubland, ME: temperate evergreen forest, MD: temperate deciduous forest, MM: temperate mixed forest, MG: temperate grassland, BF: boreal forest, TU: tundra.

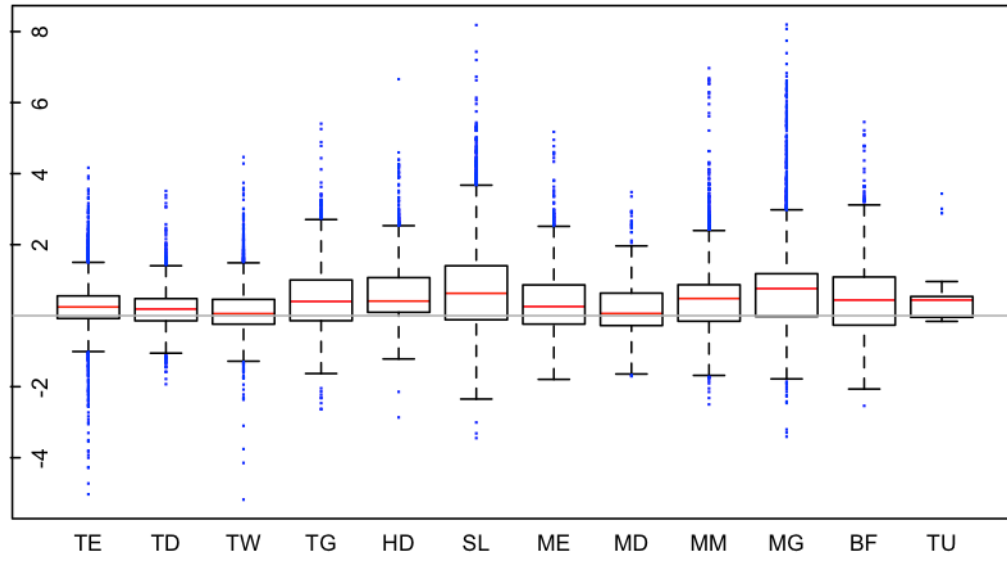

|                                            | TE    | TD    | TW    | TG    | HD    | SL    | ME    | MD    | MM    | MG    | BF    | TU    |
|--------------------------------------------|-------|-------|-------|-------|-------|-------|-------|-------|-------|-------|-------|-------|
| Q1-1.5·(Q3-Q1)                             | -1.01 | -1.06 | -1.28 | -1.63 | -1.22 | -2.35 | -1.79 | -1.64 | -1.68 | -1.78 | -2.07 | -0.16 |
| 25%ile (Q1)                                | -0.08 | -0.14 | -0.24 | -0.14 | 0.10  | -0.12 | -0.24 | -0.28 | -0.16 | -0.02 | -0.27 | -0.04 |
| Median                                     | 0.24  | 0.19  | 0.06  | 0.40  | 0.41  | 0.63  | 0.26  | 0.06  | 0.48  | 0.76  | 0.44  | 0.44  |
| 75%ile (Q3)                                | 0.56  | 0.48  | 0.46  | 1.00  | 1.07  | 1.40  | 0.87  | 0.63  | 0.87  | 1.18  | 1.09  | 0.54  |
| Q3+1.5·(Q3-Q1)                             | 1.50  | 1.41  | 1.49  | 2.71  | 2.53  | 3.67  | 2.52  | 1.96  | 2.40  | 2.98  | 3.12  | 0.96  |
| soil area, 10 <sup>6</sup> km <sup>2</sup> | 16.4  | 5.7   | 14.5  | 6.2   | 9.2   | 14.0  | 4.5   | 4.8   | 4.5   | 12.1  | 17.8  | 6.2   |

Fig. S4.3. Distribution of (means per pixel of) changes in SOC stocks ( $\text{kg C/m}^2$ ,  $P > 0.5$ ) within vegetation zones in the NPP-enhanced scenario. TE: tropical evergreen forest, TD: tropical deciduous forest, TW: tropical woodland, TG: tropical grassland, HD: hot deserts, SL: shrubland, ME: temperate evergreen forest, MD: temperate deciduous forest, MM: temperate mixed forest, MG: temperate grassland, BF: boreal forest, TU: tundra.
