# Supplementary material for: Global distribution of soil organic carbon – Part 2: Certainty of changes related to land use and climate
Source: Copernicus journal article supplement (doi:10.5194/soil-1-367-2015), 2015-04-16
Supplement: Supplementary file 2 [file soil-1-367-2015-supplement.zip › Supplementary Material/SM_5.pdf]

## Online Resource 5: Land use change in individual locations

Table S5.1. Characterization of sites. ID refers to Fig. S5.1. Ref. refers to sites in Jones et al. (2005) and Schaphoff et al. (2006). Topography refers to the diversity of slope angles at 10' resolution within the pixel (30'). Pixels with highly diverse slopes ( $SD > 0.08575$ ) were classified as 'ridged', those with lower diversity as 'rolling' ( $SD > 0.03125$ ) or 'flat'.

Jones C., McConnell C., Coleman K., Cox P., Falloon P., Jenkinson D., Powlson D. (2005) Global climate change and soil carbon stocks; predictions from two contrasting models for the turnover of organic carbon in soil. *Global Change Biology* 11, 154-166. doi: 10.1111/j.1365-2486.2004.00885.x

Schaphoff S., Lucht W., Gerten D., Sitch S., Cramer W., Prentice I. C. (2006) Terrestrial biosphere carbon storage under alternative climate projections. *Climatic Change* 74, 97-122. doi: 10.1007/s10584-005-9002-5

| ID    | Ref. | chracterization                                    | long.<br>East | lat.<br>North | topography |
|-------|------|----------------------------------------------------|---------------|---------------|------------|
| 473   |      | Taymur Peninsula, Siberia                          | 101.25        | 76.25         | flat       |
| 974   |      | Sirmlik Nat. P., Borden Pen., Baffin Isl., Canada  | -82.25        | 73.25         | ridged     |
| 1358  | J1   | Anabarskoye Plateau, Siberia                       | 105.25        | 72.25         | ridged     |
| 1472  | S1   | Borden Pen., Baffin Isl., Canada                   | -83.25        | 71.75         | rolling    |
| 2423  |      | Cape Dalhusie, NWT, Canada                         | -128.25       | 69.75         | rolling    |
| 2665  | S2b  | Yano-Indigirskaya Lowland, N-Siberia               | 146.75        | 69.75         | flat       |
| 2935  | J1K  | Anabarskoye Plateau, Siberia                       | 103.75        | 69.25         | rolling    |
| 3631  |      | N Scandes Range, Norway/Sweden                     | 18.25         | 68.25         | ridged     |
| 3724  |      | N Siberian Lowlands                                | 81.25         | 68.25         | flat       |
| 4156  |      | Bolshesamol'skaya tundra, Siberia                  | 58.25         | 67.75         | rolling    |
| 4705  |      | Putorana Plateau, Siberia                          | 86.75         | 67.25         | rolling    |
| 5612  |      | lakes between Ii and Kemi R., Finland              | 26.25         | 66.25         | flat       |
| 6645  |      | lakes between Oulu R. and Ii R., Finland           | 26.75         | 65.25         | flat       |
| 7457  |      | Anadyr' R. delta, Siberia                          | 174.75        | 64.75         | ridged     |
| 7576  |      | wetlands and lakes, SE-NWT, Canada                 | -104.25       | 64.25         | ridged     |
| 7779  |      | Yennisey-Ob R. lowlands, Siberia                   | 84.25         | 64.25         | flat       |
| 8494  |      | forest tundra, Anchorage, Alaska, USA              | -148.25       | 63.25         | ridged     |
| 8883  | S2a  | mountain tundra, Suntar-Hayata Mts, E-Siberia      | 142.75        | 63.25         | ridged     |
| 9021  |      | Klondike Plateau, Yukon, Canada                    | -132.25       | 62.75         | ridged     |
| 9230  | S3   | wetlands and lakes, Irtysh-Ob R., C-Siberia        | 73.25         | 62.75         | flat       |
| 11127 |      | wetlands and lakes, Irtysh-Ob R., C-Siberia        | 69.25         | 60.75         | flat       |
| 11654 |      | Prilensk Plateau, C-Siberia                        | 110.25        | 60.25         | flat       |
| 12797 |      | wetlands and lakes, Irtysh-Ob R., Siberia          | 74.75         | 58.75         | flat       |
| 13444 |      | Småland, Sweden                                    | 16.25         | 57.75         | flat       |
| 14171 |      | central Labrador, Canada                           | -69.25        | 56.75         | ridged     |
| 14979 |      | Zarasai, E. Lithuania                              | 26.25         | 55.75         | flat       |
| 15269 | J2   | Lac La Ronge Provincial Park, Saskatchewan, Canada | -104.75       | 55.25         | flat       |
| 16012 |      | Rocky Mts. eastern foothills, Alberta, Canada      | -115.25       | 54.25         | ridged     |
| 16376 |      | southern Kamchatka, Russia                         | 157.25        | 54.25         | ridged     |
| 17184 |      | Amur R., northern Heil-long-jiang Prov., China     | 121.25        | 53.25         | rolling    |
| 19690 |      | High Altai Mts.                                    | 92.75         | 50.25         | rolling    |
| 19932 |      | Upper Franconia, Germany                           | 10.75         | 49.75         | rolling    |
| 20183 |      | Amur wetlands, E Siberia                           | 136.25        | 49.75         | ridged     |
| 20391 |      | western Ukraine                                    | 36.25         | 49.25         | flat       |
| 21924 |      | Acadia, New Brunswick, Canada                      | -67.75        | 47.25         | rolling    |
| 22059 |      | steppe, central Kazakhstan                         | 64.25         | 47.25         | flat       |
| 22148 |      | steppe, northern Inner Mongolia                    | 108.75        | 47.25         | ridged     |

|       |     |                                                         |         |        |         |
|-------|-----|---------------------------------------------------------|---------|--------|---------|
| 22299 |     | forest/lakes, SW Québec, Canada                         | -78.25  | 46.75  | flat    |
| 22340 |     | Burgundy, France                                        | 4.25    | 46.75  | rolling |
| 23390 |     | central Minnesota, USA                                  | -94.75  | 45.25  | flat    |
| 24423 |     | central Wyoming, USA                                    | -106.75 | 43.75  | ridged  |
| 24792 |     | southern Minnesota, USA                                 | -94.75  | 43.25  | flat    |
| 24938 |     | steppe, Kazakhstan                                      | 69.75   | 43.25  | ridged  |
| 27811 |     | agriculture, steppe on loess, NE Iran                   | 45.25   | 38.75  | ridged  |
| 28030 |     | northern Kentucky, USA                                  | -85.25  | 38.25  | flat    |
| 29092 | S4K | Chai-da (Quaidam) basin, China                          | 96.25   | 36.75  | ridged  |
| 30196 |     | northeastern Iraq                                       | 45.25   | 34.75  | ridged  |
| 30299 | S4  | Upper Hung-He (Yellow) River                            | 96.75   | 34.75  | ridged  |
| 30382 |     | central New Mexico, USA                                 | -105.75 | 34.25  | ridged  |
| 32562 |     | R. Nile delta, Egypt                                    | 31.25   | 30.75  | flat    |
| 32948 |     | Punjab, Pakistan                                        | 72.75   | 30.25  | flat    |
| 33532 |     | Thar Desert, India                                      | 72.75   | 29.25  | flat    |
| 34104 |     | northern Rajasthan, India                               | 74.25   | 28.25  | flat    |
| 34453 |     | agric./forest, SE Chinese highlands                     | 109.25  | 27.75  | ridged  |
| 35020 |     | agric./forest, SE Chinese highlands                     | 113.25  | 26.75  | ridged  |
| 35414 |     | western Egypt                                           | 25.75   | 25.75  | flat    |
| 36571 |     | Yunnan, China                                           | 101.75  | 23.75  | ridged  |
| 36807 |     | Jessore, R. Ganges delta, Bangladesh                    | 89.25   | 23.25  | flat    |
| 37345 |     | western Myanmar                                         | 99.25   | 22.25  | ridged  |
| 37434 |     | southern Algeria                                        | 3.75    | 21.75  | flat    |
| 37938 |     | Tibesti Mts., Chad                                      | 18.25   | 20.75  | ridged  |
| 39958 | S5  | Darfur, Sudan                                           | 24.75   | 15.75  | rolling |
| 40849 |     | western Sudan                                           | 23.25   | 13.25  | rolling |
| 41633 | S7  | Salamat R. marshes, Chad                                | 21.75   | 10.75  | flat    |
| 42237 |     | Cord. de Mérida, Venezuela                              | -71.75  | 8.75   | ridged  |
| 42710 |     | wetland, Gambelia, Nat.P., Ethiopia                     | 34.25   | 7.75   | rolling |
| 42713 |     | western Ethiopia                                        | 35.75   | 7.75   | ridged  |
| 42714 |     | forest/agric., Jima (City), Ethiopia                    | 36.25   | 7.75   | ridged  |
| 42930 |     | forest/ agric., Central Cordilleras, Medellín, Columbia | -75.25  | 6.75   | ridged  |
| 43225 |     | forest/agric., Mendebo Highland, Ethiopia               | 38.75   | 6.25   | ridged  |
| 43762 |     | La Gran Sabana, Venezuela                               | -63.25  | 4.25   | ridged  |
| 44386 |     | Congo Basin, Kongo-Brazaville                           | 17.75   | 2.25   | flat    |
| 44387 |     | Congo Basin, Dem.Rep.Kongo                              | 18.25   | 2.25   | flat    |
| 44589 |     | Benadir Plain, Somalia                                  | 43.75   | 1.75   | flat    |
| 44724 |     | western Kenya                                           | 35.25   | 1.25   | ridged  |
| 44800 | S9  | Laranjal, Rio Negro, Brazil                             | -65.25  | 0.75   | ridged  |
| 45210 |     | coastal wetland, Sumatra, Indonesia                     | 102.75  | -0.25  | flat    |
| 45318 |     | central Dem. Rep. Congo                                 | 21.75   | -0.75  | flat    |
| 45714 |     | Cordilleras, Ecuador                                    | -78.75  | -2.25  | ridged  |
| 45748 | J4  | P. Nacional do Jaú, Brazil                              | -61.75  | -2.25  | flat    |
| 46402 |     | western Highlands, New Guinea, Indonesia                | 137.75  | -3.75  | ridged  |
| 47080 |     | forest/agric., Western Highlands, Papua-New Guinea      | 144.75  | -5.75  | ridged  |
| 47125 |     | Amazonas, Brazil                                        | -63.75  | -6.25  | flat    |
| 49290 | S6  | Kitwe, Zambia                                           | 27.75   | -13.25 | rolling |
| 49472 |     | Kakadu National Park, NT, Australia                     | 132.75  | -13.75 | rolling |
| 49644 |     | Cordilleras, Peru                                       | -71.25  | -14.75 | ridged  |
| 50426 |     | central range, Madagascar                               | 48.75   | -16.75 | ridged  |
| 51222 |     | NW Namibia                                              | 20.75   | -19.25 | flat    |
| 51276 |     | NT, Australia                                           | 129.25  | -19.25 | flat    |
| 51419 |     | central range, Madagascar                               | 47.25   | -19.75 | ridged  |
| 51986 |     | Great Divide, Queensland, Australia                     | 145.75  | -21.25 | rolling |

|       |                                                     |        |        |         |
|-------|-----------------------------------------------------|--------|--------|---------|
| 52213 | Sao Paulo, Brazil                                   | -49.25 | -22.25 | flat    |
| 52365 | shrubland/agric., Gran Chaco, Argent./Parag./Boliv. | -62.75 | -22.75 | flat    |
| 52415 | Gobabis, Namibia                                    | 18.75  | -22.75 | flat    |
| 52673 | Alice Springs, central Australia                    | 134.75 | -23.25 | rolling |
| 52737 | Mato Grosso do Sul, Brazil                          | -54.25 | -23.75 | rolling |
| 52975 | southern Madagascar                                 | 46.75  | -24.25 | ridged  |
| 53094 | Paraná, Brazil                                      | -50.25 | -24.75 | ridged  |
| 53838 | SW Queensland, Australia                            | 143.25 | -26.75 | flat    |
| 54027 | Gran Chaco, Argentina                               | -64.75 | -27.75 | rolling |
| 55427 | NW New South Wales, Australia                       | 141.75 | -32.25 | rolling |
| 55497 | Great Karoo, South Africa                           | 23.25  | -32.75 | rolling |
| 55593 | central Uruguay                                     | -55.75 | -33.25 | flat    |
| 55968 | Pampa, Argentina                                    | -67.25 | -35.75 | ridged  |
| 56048 | S8 Little Desert, southern Australia                | 141.75 | -36.25 | flat    |
| 56113 | Australian Alps, New South Wales, Australia         | 148.25 | -36.75 | ridged  |
| 56486 | central Tasmania, Australia                         | 146.25 | -42.25 | ridged  |
| 56566 | Cordillera Patagonica, Chile                        | -71.75 | -44.25 | ridged  |
| 56571 | southern Patagonia, Argentina                       | -69.25 | -44.25 | ridged  |
| 56582 | central South Island, New Zealand                   | 170.25 | -44.25 | ridged  |

Fig. S5.1. Location of sites used in Table S5.1.

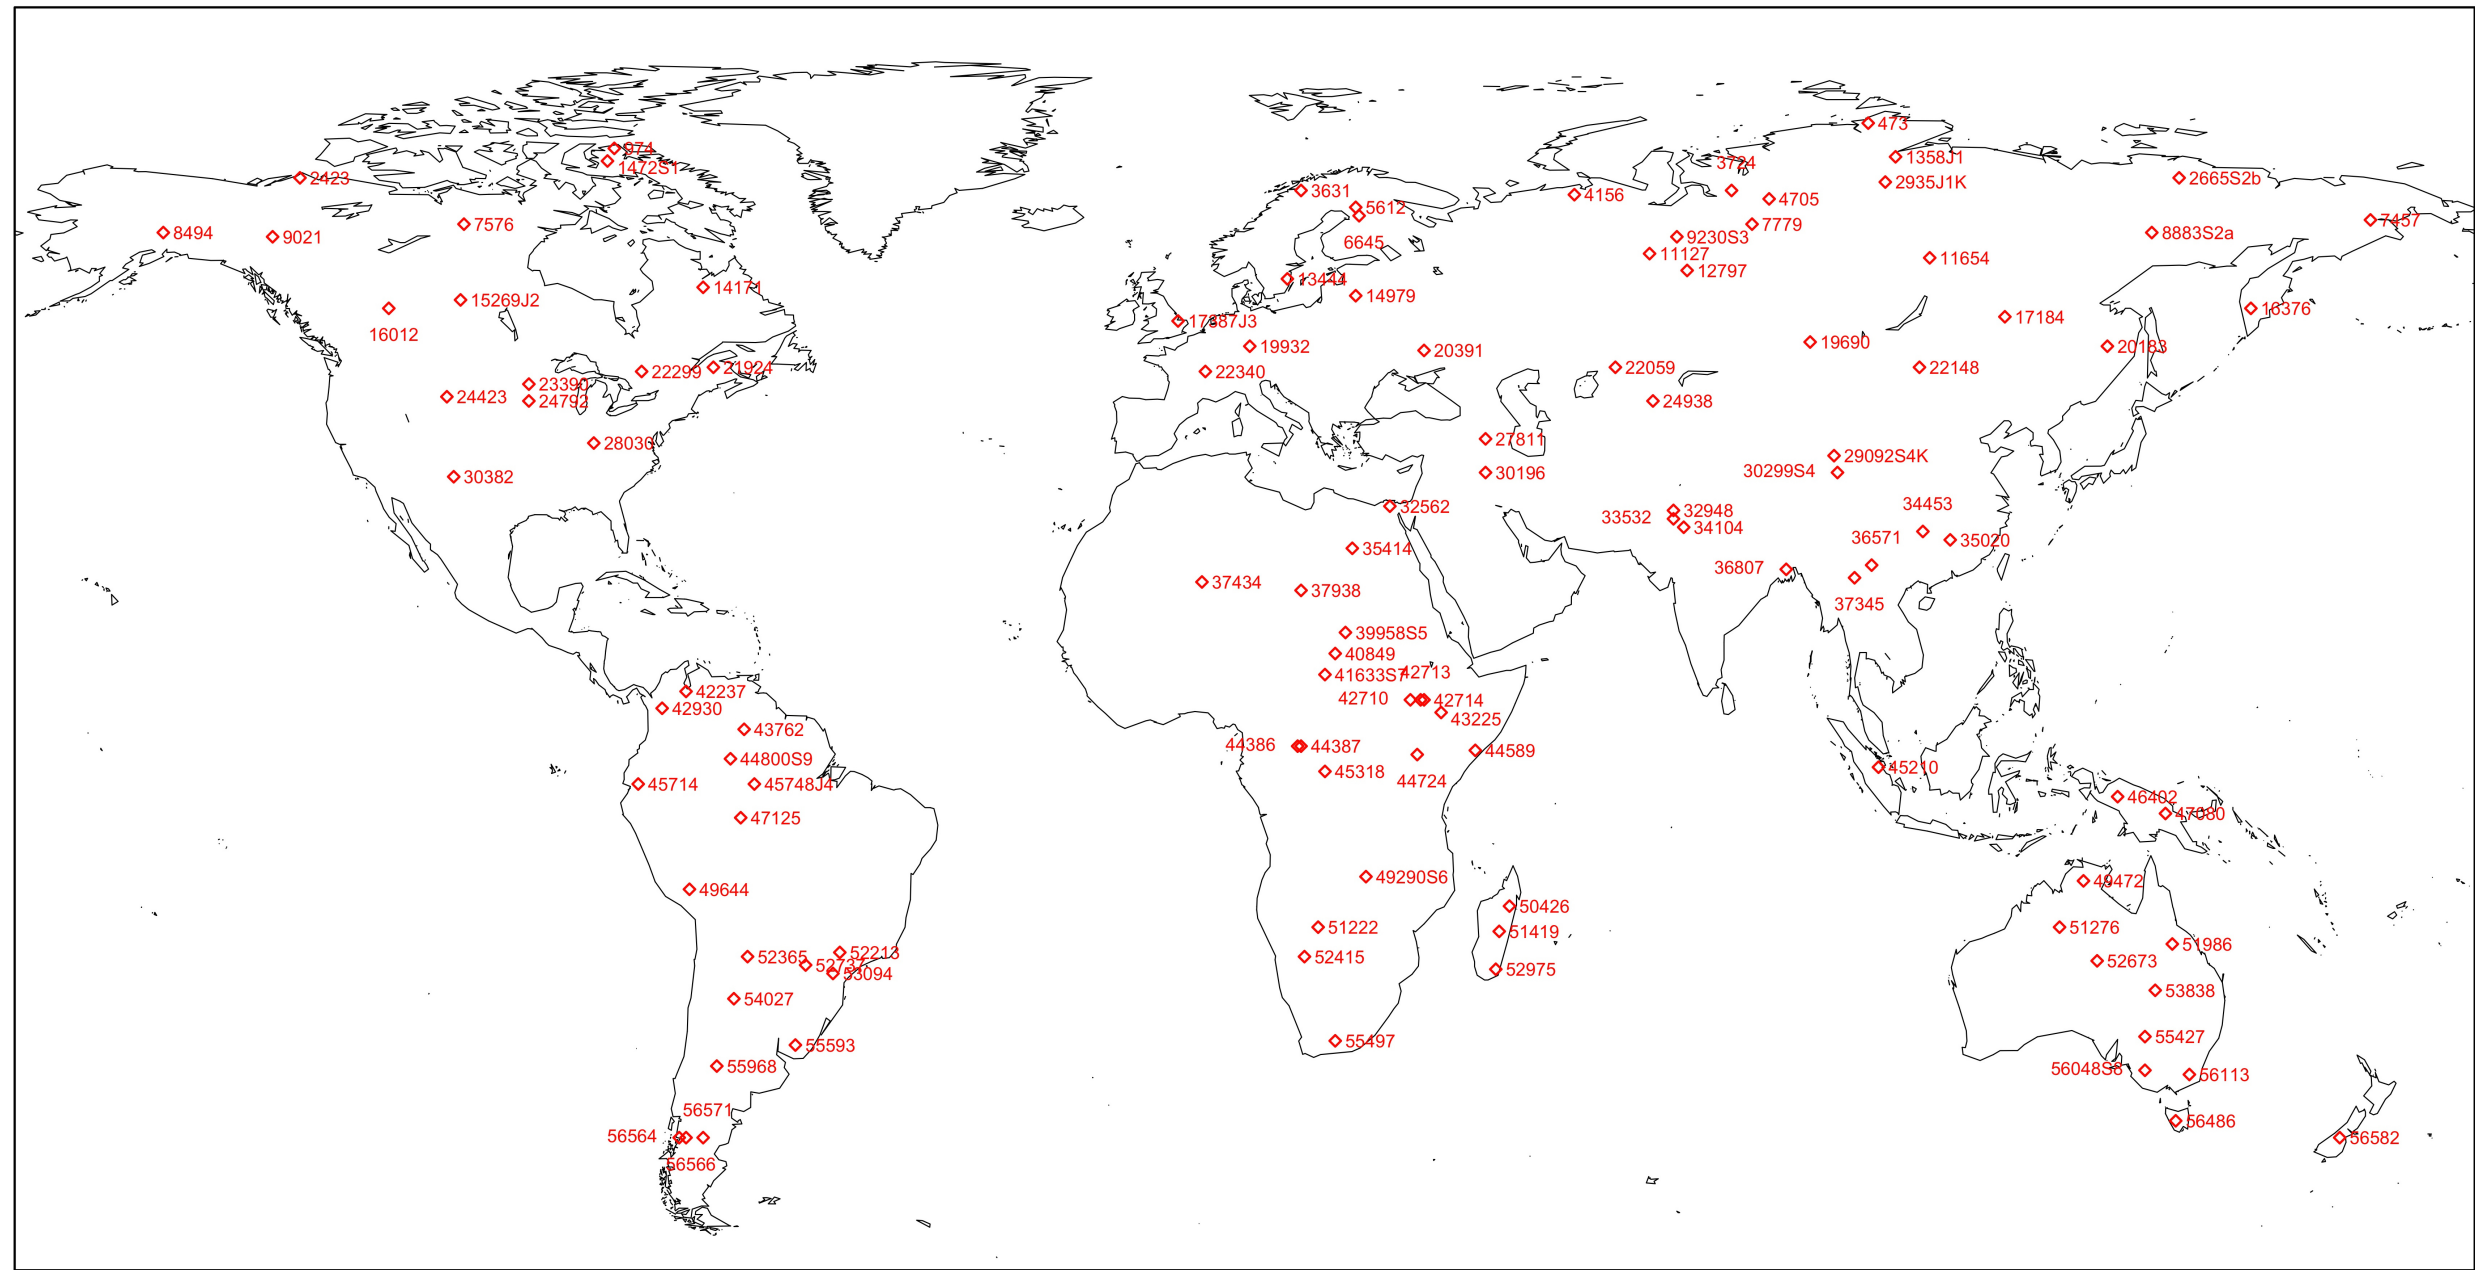

Table S5.2. Effect of land use changes at specific locations under the enhanced-NPP scenario. \* to wetland if reference is wetland, NC: not conceivable under the settings of the other variables

|                            | zonal veg. | reference<br>land use | ID    | <i>f<sub>mf</sub></i> | frost<br>cm | NPP <sub>0</sub><br>kg m <sup>2</sup> yr <sup>-1</sup> | NPP <sub>t</sub><br>kg m <sup>2</sup> yr <sup>-1</sup> | C ref.<br>kg/m <sup>2</sup> | HWSO<br>kg/m <sup>2</sup> | Δ <i>f<sub>mf</sub></i> | Δfrost<br>cm | ΔNPP <sub>0</sub><br>kg/m <sup>2</sup> | ΔNPP <sub>t</sub><br>kg/m <sup>2</sup> | ΔC<br>kg/m <sup>2</sup> | P  | ΔNPP <sub>t</sub><br>kg/m <sup>2</sup> | ΔC<br>kg/m <sup>2</sup> | P  | ΔNPP <sub>t</sub><br>kg/m <sup>2</sup> | ΔC<br>kg/m <sup>2</sup> | P  | ΔNPP <sub>t</sub><br>kg/m <sup>2</sup> | ΔC<br>kg/m <sup>2</sup> | P  |
|----------------------------|------------|-----------------------|-------|-----------------------|-------------|--------------------------------------------------------|--------------------------------------------------------|-----------------------------|---------------------------|-------------------------|--------------|----------------------------------------|----------------------------------------|-------------------------|----|----------------------------------------|-------------------------|----|----------------------------------------|-------------------------|----|----------------------------------------|-------------------------|----|
|                            |            |                       |       |                       |             |                                                        |                                                        |                             |                           |                         |              |                                        | to zonal*                              |                         |    | to plantation                          |                         |    | to pasture                             |                         |    | to crops                               |                         |    |
| Tundra                     | zonal      |                       | 974   | 0.13                  | 26          | 0.00                                                   | 0.00                                                   | 7.0                         | 6.4                       | 0.01                    | 10           | 0.00                                   | 0.00                                   | -0.1                    |    | 0.00                                   | -0.1                    |    | 0.00                                   | -0.1                    |    | 0.00                                   | -0.1                    |    |
| Tundra                     | zonal      |                       | 1472  | 0.13                  | 34          | 0.00                                                   | 0.00                                                   | 6.8                         | 6.3                       | 0.01                    | 11           | 0.03                                   | 0.10                                   | 0.9                     |    | 0.12                                   | 1.1                     |    | 0.10                                   | 0.9                     |    | 0.10                                   | 0.9                     |    |
| Tundra                     | zonal      |                       | 30299 | 0.14                  | 53          | 0.08                                                   | 0.10                                                   | 8.9                         | 9.3                       | 0.01                    | 18           | 0.41                                   | 0.40                                   | 4.7                     | ++ | 0.20                                   | 2.2                     | +  | 0.33                                   | 3.8                     | ++ | 0.35                                   | 4.1                     | ++ |
| Tundra                     | zonal      |                       | 473   | 0.13                  | 33          | 0.22                                                   | 0.30                                                   | 14.8                        | 7.8                       | 0.01                    | 14           | -0.03                                  | -0.20                                  | -2.9                    | ++ | -0.18                                  | -2.6                    | +  | -0.20                                  | -2.9                    | ++ | -0.20                                  | -2.9                    | ++ |
| Tundra                     | zonal      |                       | 3631  | 0.14                  | 55          | 0.26                                                   | 0.30                                                   | 17.8                        | 14.8                      | 0.01                    | 16           | 0.11                                   | 0.00                                   | -0.9                    |    | -0.10                                  | -2.2                    | +  | -0.03                                  | -1.3                    |    | -0.02                                  | -1.2                    |    |
| Tundra                     | zonal      |                       | 7576  | 0.14                  | 58          | 0.33                                                   | 0.30                                                   | 13.8                        | 6.5                       | 0.00                    | 12           | 0.10                                   | 0.20                                   | 2.5                     |    | 0.01                                   | -0.1                    |    | 0.13                                   | 1.5                     |    | 0.15                                   | 1.9                     |    |
| Tundra                     | zonal      |                       | 8494  | 0.14                  | 63          | 0.34                                                   | 0.30                                                   | 17.3                        | 12.9                      | 0.00                    | 11           | 0.03                                   | 0.00                                   | -0.5                    |    | -0.10                                  | -1.8                    |    | -0.03                                  | -0.9                    |    | -0.02                                  | -0.8                    |    |
| Tundra                     | zonal      |                       | 3724  | 0.14                  | 63          | 0.35                                                   | 0.30                                                   | 18.0                        | 13.8                      | 0.00                    | 12           | 0.09                                   | 0.20                                   | 2.5                     |    | 0.01                                   | -0.4                    |    | 0.13                                   | 1.5                     |    | 0.15                                   | 1.9                     |    |
| Tundra                     | zonal      |                       | 3034  | 0.14                  | 61          | 0.35                                                   | 0.30                                                   | 18.1                        | 14.3                      | 0.00                    | 9            | 0.13                                   | 0.20                                   | 2.5                     |    | 0.01                                   | -0.4                    |    | 0.13                                   | 1.4                     |    | 0.15                                   | 1.8                     |    |
| Boreal Forest              | plantation |                       | 4705  | 0.14                  | 71          | 0.35                                                   | 0.28                                                   | 16.3                        | 10.6                      | 0.00                    | 11           | 0.06                                   | 0.22                                   | 2.8                     |    | 0.01                                   | -0.3                    |    | 0.15                                   | 1.6                     |    | 0.18                                   | 2.2                     |    |
| Boreal Forest              | plantation |                       | 11654 | 0.14                  | 80          | 0.44                                                   | 0.46                                                   | 21.3                        | 10.8                      | 0.00                    | 11           | 0.08                                   | 0.04                                   | -0.1                    |    | -0.17                                  | -3.3                    | +  | -0.03                                  | -1.4                    |    | 0.00                                   | -0.8                    |    |
| Boreal Forest              | plantation |                       | 5612  | 0.08                  | 100         | 0.51                                                   | 0.46                                                   | 41.6                        | 25.2                      | 0.02                    | 0            | 0.12                                   | 0.24                                   | 2.6                     |    | -0.10                                  | -4.3                    |    | 0.07                                   | -1.0                    |    | 0.13                                   | 0.3                     |    |
| Boreal Forest              | plantation |                       | 17184 | 0.14                  | 86          | 0.52                                                   | 0.46                                                   | 18.3                        | 9.9                       | 0.00                    | 12           | 0.10                                   | 0.24                                   | 2.7                     |    | -0.10                                  | -1.9                    |    | 0.07                                   | 0.2                     |    | 0.13                                   | 1.3                     |    |
| Boreal Forest              | plantation |                       | 6645  | 0.08                  | 100         | 0.52                                                   | 0.46                                                   | 41.5                        | 25.8                      | 0.03                    | 0            | 0.12                                   | 0.24                                   | 0.9                     |    | -0.10                                  | -5.4                    | +  | 0.07                                   | -2.4                    |    | 0.13                                   | -1.1                    |    |
| Boreal Forest              | plantation |                       | 20183 | 0.09                  | 100         | 0.53                                                   | 0.46                                                   | 33.5                        | 19.5                      | 0.03                    | 0            | 0.05                                   | 0.04                                   | -2.2                    |    | -0.17                                  | -5.6                    | +  | -0.03                                  | -3.5                    |    | 0.00                                   | -2.9                    |    |
| Boreal Forest              | plantation |                       | 13551 | 0.08                  | 100         | 0.56                                                   | 0.46                                                   | 42.7                        | 23.6                      | 0.00                    | 0            | 0.10                                   | 0.24                                   | 5.4                     |    | -0.10                                  | -2.3                    |    | 0.07                                   | 1.4                     |    | 0.13                                   | 2.8                     |    |
| Boreal Forest              | plantation |                       | 12797 | 0.13                  | 100         | 0.56                                                   | 0.46                                                   | 26.0                        | 16.1                      | 0.00                    | 0            | 0.10                                   | 0.24                                   | 4.2                     |    | -0.10                                  | -1.5                    |    | 0.07                                   | 1.2                     |    | 0.13                                   | 2.3                     |    |
| Boreal Forest              | wetland    |                       | 7779  | 0.13                  | 76          | 0.45                                                   | 0.47                                                   | 26.0                        | 12.4                      | 0.00                    | 13           | 0.04                                   | 0.00                                   | -0.1                    |    | -0.18                                  | -4.9                    | ++ | -0.05                                  | -2.8                    | +  | -0.02                                  | -2.1                    |    |
| Boreal Forest              | wetland    |                       | 9230  | 0.13                  | 79          | 0.51                                                   | 0.47                                                   | 37.7                        | 25.5                      | 0.00                    | 13           | 0.06                                   | 0.00                                   | -0.3                    |    | -0.18                                  | -5.0                    | +  | -0.05                                  | -3.3                    | +  | -0.02                                  | -2.7                    |    |
| Boreal Forest              | wetland    |                       | 11127 | 0.13                  | 100         | 0.52                                                   | 0.47                                                   | 37.6                        | 20.9                      | 0.00                    | 0            | 0.07                                   | 0.00                                   | -0.5                    |    | -0.18                                  | -5.6                    | ++ | -0.05                                  | -3.9                    | +  | -0.02                                  | -3.4                    | +  |
| Boreal Forest              | wetland    |                       | 15269 | 0.10                  | 100         | 0.58                                                   | 0.47                                                   | 35.2                        | 17.0                      | 0.00                    | 0            | 0.14                                   | 0.09                                   | 2.1                     |    | -0.12                                  | -5.0                    | +  | 0.05                                   | -1.7                    |    | 0.11                                   | -0.4                    |    |
| Boreal Forest              | zonal      |                       | 2423  | 0.14                  | 53          | 0.02                                                   | 0.10                                                   | 12.4                        | 11.8                      | 0.00                    | 10           | -0.02                                  | 0.00                                   | -0.3                    |    | 0.04                                   | 0.1                     |    | 0.00                                   | -0.4                    |    | 0.00                                   | -0.3                    |    |
| Boreal Forest              | zonal      |                       | 16376 | 0.14                  | 50          | 0.12                                                   | 0.10                                                   | 23.7                        | 29.6                      | 0.00                    | 16           | 0.26                                   | 0.20                                   | 2.3                     |    | 0.06                                   | 0.2                     |    | 0.16                                   | 1.6                     |    | 0.18                                   | 2.0                     |    |
| Boreal Forest              | zonal      |                       | 7452  | 0.14                  | 61          | 0.32                                                   | 0.30                                                   | 13.6                        | 9.8                       | 0.00                    | 11           | 0.10                                   | 0.20                                   | 2.4                     |    | -0.01                                  | -0.4                    |    | 0.13                                   | 1.2                     |    | 0.16                                   | 1.8                     |    |
| Boreal Forest              | zonal      |                       | 7457  | 0.14                  | 63          | 0.32                                                   | 0.30                                                   | 29.4                        | 20.1                      | 0.00                    | 11           | 0.11                                   | 0.20                                   | 2.1                     |    | -0.01                                  | -0.5                    |    | 0.13                                   | 1.1                     |    | 0.16                                   | 1.6                     |    |
| Boreal Forest              | zonal      |                       | 7959  | 0.13                  | 63          | 0.32                                                   | 0.30                                                   | 30.0                        | 27.1                      | 0.00                    | 11           | 0.11                                   | 0.20                                   | 2.3                     |    | -0.01                                  | -0.4                    |    | 0.13                                   | 1.3                     |    | 0.16                                   | 1.8                     |    |
| Boreal Forest              | zonal      |                       | 2665  | 0.14                  | 59          | 0.32                                                   | 0.30                                                   | 18.1                        | 10.7                      | 0.00                    | 10           | 0.08                                   | 0.20                                   | 2.4                     |    | -0.01                                  | -0.7                    |    | 0.13                                   | 1.2                     |    | 0.16                                   | 1.8                     |    |
| Boreal Forest              | zonal      |                       | 1358  | 0.13                  | 55          | 0.33                                                   | 0.30                                                   | 18.2                        | 13.3                      | 0.00                    | 12           | 0.05                                   | 0.00                                   | -0.5                    |    | -0.14                                  | -2.5                    | +  | -0.04                                  | -1.2                    |    | -0.02                                  | -0.8                    |    |
| Boreal Forest              | zonal      |                       | 4156  | 0.14                  | 64          | 0.34                                                   | 0.30                                                   | 28.5                        | 23.1                      | 0.00                    | 15           | 0.15                                   | 0.20                                   | 1.8                     |    | -0.01                                  | -0.9                    |    | 0.13                                   | 0.7                     |    | 0.16                                   | 1.3                     |    |
| Boreal Forest              | zonal      |                       | 8883  | 0.14                  | 62          | 0.35                                                   | 0.30                                                   | 18.2                        | 14.0                      | 0.00                    | 12           | 0.05                                   | 0.00                                   | -0.5                    |    | -0.14                                  | -2.4                    | +  | -0.04                                  | -1.1                    |    | -0.02                                  | -0.7                    |    |
| Boreal Forest              | zonal      |                       | 2935  | 0.14                  | 63          | 0.35                                                   | 0.30                                                   | 17.3                        | 11.3                      | 0.00                    | 10           | 0.06                                   | 0.20                                   | 2.4                     |    | -0.01                                  | -0.6                    |    | 0.13                                   | 1.2                     |    | 0.16                                   | 1.8                     |    |
| Boreal Forest              | zonal      |                       | 9021  | 0.14                  | 67          | 0.37                                                   | 0.30                                                   | 13.5                        | 5.3                       | 0.00                    | 11           | 0.05                                   | 0.20                                   | 2.4                     |    | -0.01                                  | -0.4                    |    | 0.13                                   | 1.3                     |    | 0.16                                   | 1.9                     |    |
| Boreal Forest              | zonal      |                       | 14171 | 0.14                  | 66          | 0.38                                                   | 0.30                                                   | 8.9                         | 1.4                       | 0.00                    | 14           | 0.11                                   | 0.20                                   | 2.6                     | +  | -0.01                                  | -0.2                    |    | 0.13                                   | 1.5                     |    | 0.16                                   | 2.1                     |    |
| Temperate Grassland        | crops      |                       | 56048 | 0.16                  | 100         | 0.49                                                   | 0.25                                                   | 9.3                         | 5.5                       | 0.00                    | 0            | 0.16                                   | 0.42                                   | 4.3                     | ++ | 0.09                                   | 1.0                     |    | 0.31                                   | 3.2                     | +  | 0.35                                   | 3.4                     | +  |
| Temperate Grassland        | crops      |                       | 20391 | 0.15                  | 100         | 0.52                                                   | 0.25                                                   | 13.6                        | 14.8                      | 0.00                    | 0            | 0.19                                   | 0.42                                   | 4.6                     | ++ | 0.09                                   | 1.0                     |    | 0.31                                   | 3.5                     | +  | 0.35                                   | 3.7                     | +  |
| Temperate Grassland        | crops      |                       | 23390 | 0.15                  | 100         | 0.64                                                   | 0.35                                                   | 15.1                        | 10.5                      | 0.01                    | 0            | 0.11                                   | 0.32                                   | 3.1                     | +  | 0.00                                   | -0.6                    |    | 0.22                                   | 1.9                     |    | 0.25                                   | 2.3                     |    |
| Temperate Grassland        | crops      |                       | 24792 | 0.15                  | 100         | 0.67                                                   | 0.35                                                   | 16.0                        | 13.1                      | 0.01                    | 0            | 0.12                                   | 0.32                                   | 3.2                     | +  | 0.00                                   | -0.4                    |    | 0.22                                   | 2.1                     |    | 0.25                                   | 2.3                     |    |
| Temperate Grassland        | pasture    |                       | 55427 | 0.15                  | 100         | 0.12                                                   | 0.10                                                   | 6.2                         | 5.4                       | 0.01                    | 0            | 0.24                                   | NC                                     |                         |    | 0.03                                   | 0.4                     |    | 0.15                                   | 1.5                     | +  | 0.16                                   | 1.5                     | +  |
| Temperate Grassland        | pasture    |                       | 22162 | 0.14                  | 100         | 0.21                                                   | 0.25                                                   | 11.7                        | 9.6                       | 0.01                    | 0            | 0.51                                   | 0.42                                   | 4.7                     | +  | 0.09                                   | 0.7                     |    | 0.31                                   | 3.4                     | +  | 0.34                                   | 3.8                     | +  |
| Temperate Grassland        | pasture    |                       | 27811 | 0.15                  | 100         | 0.23                                                   | 0.25                                                   | 7.8                         | 4.8                       | 0.01                    | 0            | 0.23                                   | 0.22                                   | 2.1                     | +  | -0.01                                  | -0.2                    |    | 0.16                                   | 1.4                     |    | 0.17                                   | 1.5                     |    |
| Temperate Grassland        | pasture    |                       | 22148 | 0.14                  | 100         | 0.24                                                   | 0.25                                                   | 14.6                        | 10.3                      | 0.00                    | 0            | 0.58                                   | 0.61                                   | 7.9                     | ++ | 0.19                                   | 2.6                     |    | 0.49                                   | 6.4                     | ++ | 0.51                                   | 6.5                     | ++ |
| Temperate Grassland        | pasture    |                       | 22927 | 0.14                  | 100         | 0.30                                                   | 0.25                                                   | 11.7                        | 7.6                       | 0.00                    | 0            | 0.52                                   | 0.61                                   | 7.8                     | ++ | 0.19                                   | 2.2                     |    | 0.49                                   | 6.1                     | ++ | 0.51                                   | 6.4                     | ++ |
| Temperate Grassland        | pasture    |                       | 21760 | 0.14                  | 100         | 0.32                                                   | 0.25                                                   | 11.7                        | 9.3                       | 0.00                    | 0            | 0.54                                   | 0.61                                   | 7.8                     | ++ | 0.19                                   | 2.2                     |    | 0.49                                   | 6.1                     | ++ | 0.51                                   | 6.4                     | ++ |
| Temperate Grassland        | pasture    |                       | 56571 | 0.15                  | 100         | 0.47                                                   | 0.41                                                   | 13.9                        | 5.0                       | 0.00                    | 0            | -0.09                                  | -0.12                                  | -1.6                    |    | -0.27                                  | -3.2                    | ++ | -0.16                                  | -2.0                    |    | -0.15                                  | -1.9                    |    |
| Temperate Grassland        | pasture    |                       | 21864 | 0.15                  | 100         | 0.53                                                   | 0.41                                                   | 14.7                        | 7.3                       | 0.00                    | 0            | 0.15                                   | 0.26                                   | 2.9                     |    | -0.07                                  | -0.9                    |    | 0.15                                   | 1.5                     |    | 0.18                                   | 2.0                     |    |
| Temperate Grassland        | pasture    |                       | 49644 | 0.15                  | 100         | 0.59                                                   | 0.41                                                   | 13.1                        | 5.8                       | 0.00                    | 0            | 0.53                                   | 0.65                                   | 6.9                     | ++ | 0.11                                   | 1.2                     |    | 0.49                                   | 5.3                     | ++ | 0.52                                   | 5.6                     | ++ |
| Temperate Grassland        | pasture    |                       | 56582 | 0.15                  | 100         | 0.67                                                   | 0.58                                                   | 17.5                        | 8.7                       | 0.00                    | 0            | 0.21                                   | 0.29                                   | 2.8                     |    | -0.14                                  | -1.8                    |    | 0.16                                   | 1.4                     |    | 0.19                                   | 1.7                     |    |
| Temperate Grassland        | pasture    |                       | 55593 | 0.23                  | 100         | 0.75                                                   | 0.58                                                   | 20.4                        | 15.8                      | 0.04                    | 0            | 0.52                                   | 0.70                                   | 4.3                     |    | 0.08                                   | -0.2                    |    | 0.54                                   | 3.1                     |    | 0.59                                   | 3.4                     |    |
| Temperate Grassland        | plantation |                       | 24938 | 0.15                  | 100         | 0.42                                                   | 0.43                                                   | 15.1                        | 5.6                       | 0.01                    | 0            | -0.03                                  | -0.14                                  | -2.0                    |    | -0.29                                  | -3.5                    | ++ | -0.18                                  | -2.4                    |    | -0.17                                  | -2.2                    |    |
| Temperate Grassland        | plantation |                       | 56486 | 0.15                  | 100         | 0.71                                                   | 0.60                                                   | 19.2                        | 10.9                      | 0.00                    | 0            | 0.52                                   | 0.68                                   | 6.9                     | ++ | 0.06                                   | 0.7                     |    | 0.52                                   | 5.5                     | +  | 0.56                                   | 5.9                     | +  |
| Temperate Grassland        | plantation |                       | 46402 | 0.15                  | 100         | 1.17                                                   | 0.94                                                   | 26.5                        | 12.1                      | 0.09                    | 0            | 0.16                                   | 0.34                                   | -0.2                    |    | -0.28                                  | -4.9                    | +  | 0.18                                   | -1.3                    |    | 0.22                                   | -1.0                    |    |
| Temperate Grassland        | wetland    |                       | 19690 | 0.11                  | 100         | 0.18                                                   | 0.10                                                   | 10.9                        | 7.3                       | 0.00                    | 0            | 0.27                                   | 0.30                                   | 5.8                     | ++ | 0.12                                   | 1.4                     |    | 0.26                                   | 4.1                     |    | 0.28                                   | 4.3                     |    |
| Temperate Deciduous Forest | crops      |                       | 17817 | 0.15                  | 100         | 0.58                                                   | 0.23                                                   | 9.0                         | 8.1                       | 0.00                    | 0            | 0.10                                   | 0.47                                   | 4.7                     | ++ | 0.09                                   | 0.9                     |    | 0.24                                   | 2.4                     | +  | 0.29                                   | 2.8                     | +  |
| Temperate Deciduous Forest | crops      |                       | 17387 | 0.15                  | 100         | 0.60                                                   | 0.23                                                   | 9.7                         | 9.7                       | 0.01                    | 0            | 0.09                                   | 0.47                                   | 4.8                     | ++ | 0.09                                   | 0.7                     |    | 0.24                                   | 2.1                     | +  | 0.29                                   | 2.7                     | +  |
| Temperate Deciduous Forest | zonal      |                       | 28030 | 0.16                  | 100         | 0.61                                                   | 0.70                                                   | 19.3                        | 7.9                       | 0.09                    | 0            | 0.11                                   | 0.00                                   | -2.2                    |    | -0.38                                  | -5.1                    | ++ | -0.23                                  | -3.9                    | +  | -0.18                                  | -3.6                    | +  |
| Temperate Deciduous Forest | zonal      |                       | 19932 | 0.15                  | 100         | 0.63                                                   | 0.70                                                   | 22.6                        | 11.3                      | 0.01                    | 0            | 0.07                                   | 0.00                                   | -0.6                    |    | -0.38                                  | -4.8                    | ++ | -0.23                                  | -3.2                    |    | -0.18                                  | -2.6                    |    |

| zonal veg.                 | reference<br>land use | ID    | <i>fmf</i> | frost<br>cm | NPP <sub>0</sub><br>kg m <sup>2</sup> yr <sup>-1</sup> | NPP <sub>t</sub><br>kg m <sup>2</sup> yr <sup>-1</sup> | C ref.<br>kg/m <sup>2</sup> | HWSO<br>kg/m <sup>2</sup> | Δfmf | Δfrost<br>cm | ΔNPP <sub>0</sub><br>kg/m <sup>2</sup> | ΔNPP <sub>t</sub><br>kg/m <sup>2</sup> | ΔC<br>kg/m <sup>2</sup> | P  | ΔNPP <sub>t</sub><br>kg/m <sup>2</sup> | ΔC<br>kg/m <sup>2</sup> | P  | ΔNPP <sub>t</sub><br>kg/m <sup>2</sup> | ΔC<br>kg/m <sup>2</sup> | P  | ΔNPP <sub>t</sub><br>kg/m <sup>2</sup> | ΔC<br>kg/m <sup>2</sup> | P  |
|----------------------------|-----------------------|-------|------------|-------------|--------------------------------------------------------|--------------------------------------------------------|-----------------------------|---------------------------|------|--------------|----------------------------------------|----------------------------------------|-------------------------|----|----------------------------------------|-------------------------|----|----------------------------------------|-------------------------|----|----------------------------------------|-------------------------|----|
| Temperate Mixed Forest     | plantation            | 16012 | 0.14       | 100         | 0.57                                                   | 0.39                                                   | 15.7                        | 9.3                       | 0.01 | 0            | 0.30                                   | 0.51                                   | 6.0                     | +  | 0.02                                   | -0.4                    |    | 0.29                                   | 2.9                     |    | 0.36                                   | 3.9                     | +  |
| Temperate Mixed Forest     | plantation            | 56566 | 0.15       | 100         | 0.57                                                   | 0.39                                                   | 24.7                        | 26.1                      | 0.00 | 0            | 0.47                                   | 0.71                                   | 7.8                     | ++ | 0.12                                   | 1.2                     |    | 0.40                                   | 4.4                     | +  | 0.57                                   | 6.4                     | ++ |
| Temperate Mixed Forest     | plantation            | 14979 | 0.14       | 100         | 0.60                                                   | 0.39                                                   | 16.8                        | 11.6                      | 0.01 | 0            | 0.14                                   | 0.31                                   | 3.0                     |    | -0.07                                  | -1.7                    |    | 0.14                                   | 0.9                     |    | 0.15                                   | 1.1                     |    |
| Temperate Mixed Forest     | plantation            | 22299 | 0.13       | 100         | 0.60                                                   | 0.39                                                   | 23.3                        | 19.2                      | 0.01 | 0            | 0.22                                   | 0.51                                   | 5.7                     | +  | 0.02                                   | -0.9                    |    | 0.29                                   | 2.6                     |    | 0.36                                   | 3.6                     |    |
| Temperate Mixed Forest     | plantation            | 21924 | 0.14       | 100         | 0.62                                                   | 0.56                                                   | 25.2                        | 15.9                      | 0.01 | 0            | 0.17                                   | 0.14                                   | 0.5                     |    | -0.24                                  | -4.2                    | +  | -0.02                                  | -1.5                    |    | -0.01                                  | -1.5                    |    |
| Temperate Mixed Forest     | plantation            | 56564 | 0.15       | 100         | 0.62                                                   | 0.56                                                   | 21.2                        | 20.0                      | 0.00 | 0            | 0.54                                   | 0.54                                   | 6.1                     | +  | -0.04                                  | -0.6                    |    | 0.23                                   | 2.5                     |    | 0.40                                   | 4.6                     | +  |
| Temperate Mixed Forest     | zonal                 | 37101 | 0.23       | 100         | 0.56                                                   | 0.50                                                   | 12.6                        | 7.0                       | 0.05 | 0            | 0.80                                   | 0.85                                   | 5.6                     | +  | 0.12                                   | 0.1                     |    | 0.44                                   | 2.3                     |    | 0.72                                   | 4.6                     | +  |
| Temperate Mixed Forest     | zonal                 | 22340 | 0.15       | 100         | 0.65                                                   | 0.70                                                   | 19.9                        | 7.7                       | 0.02 | 0            | 0.10                                   | 0.00                                   | -0.9                    |    | -0.38                                  | -4.7                    | ++ | -0.17                                  | -2.6                    |    | -0.15                                  | -2.6                    |    |
| Temperate Evergreen Forest | plantation            | 13444 | 0.15       | 100         | 0.56                                                   | 0.40                                                   | 16.1                        | 11.2                      | 0.00 | 0            | 0.16                                   | 0.31                                   | 3.3                     | +  | -0.07                                  | -1.3                    |    | 0.03                                   | -0.2                    |    | 0.17                                   | 1.6                     |    |
| Temperate Evergreen Forest | plantation            | 35029 | 0.26       | 100         | 0.67                                                   | 0.56                                                   | 13.6                        | 8.8                       | 0.04 | 0            | -0.06                                  | 0.14                                   | 0.3                     |    | -0.24                                  | -2.2                    | +  | -0.14                                  | -1.7                    |    | 0.00                                   | -0.7                    |    |
| Temperate Evergreen Forest | plantation            | 56113 | 0.15       | 100         | 0.76                                                   | 0.56                                                   | 16.3                        | 9.4                       | 0.00 | 0            | 0.33                                   | 0.54                                   | 5.7                     | +  | -0.05                                  | -0.7                    |    | 0.21                                   | 2.0                     |    | 0.34                                   | 3.6                     |    |
| Temperate Evergreen Forest | wetland               | 12687 | 0.12       | 100         | 0.62                                                   | 0.47                                                   | 23.2                        | 9.7                       | 0.01 | 0            | -0.03                                  | -0.06                                  | -2.0                    |    | -0.19                                  | -5.9                    | ++ | -0.11                                  | -4.8                    | +  | 0.00                                   | -3.4                    | +  |
| Temperate Evergreen Forest | zonal                 | 34453 | 0.24       | 100         | 0.64                                                   | 0.70                                                   | 16.8                        | 9.9                       | 0.04 | 0            | -0.06                                  | -0.20                                  | -2.5                    |    | -0.47                                  | -4.3                    | ++ | -0.39                                  | -3.8                    | ++ | -0.31                                  | -3.2                    | +  |
| Shrubland                  | crops                 | 32948 | 0.26       | 100         | 0.04                                                   | 0.14                                                   | 5.8                         | 5.2                       | 0.07 | 0            | 0.39                                   | 0.36                                   | 1.5                     | +  | 0.15                                   | 0.5                     |    | NC                                     |                         |    | 0.27                                   | 1.1                     | +  |
| Shrubland                  | zonal                 | 34104 | 0.19       | 100         | 0.05                                                   | 0.10                                                   | 3.9                         | 4.9                       | 0.03 | 0            | 0.44                                   | 0.40                                   | 3.1                     | ++ | 0.19                                   | 1.5                     | +  | 0.33                                   | 2.6                     | ++ | 0.31                                   | 2.4                     | ++ |
| Shrubland                  | zonal                 | 52673 | 0.17       | 100         | 0.13                                                   | 0.10                                                   | 4.1                         | 4.7                       | 0.07 | 0            | 0.31                                   | 0.40                                   | 2.7                     | ++ | 0.19                                   | 1.3                     |    | 0.33                                   | 2.3                     | ++ | 0.31                                   | 2.2                     | +  |
| Shrubland                  | zonal                 | 55497 | 0.15       | 100         | 0.13                                                   | 0.10                                                   | 6.1                         | 6.0                       | 0.01 | 0            | 0.27                                   | 0.20                                   | 1.9                     | ++ | 0.09                                   | 1.0                     |    | 0.16                                   | 1.7                     | +  | 0.15                                   | 1.5                     | +  |
| Shrubland                  | zonal                 | 30382 | 0.15       | 100         | 0.14                                                   | 0.10                                                   | 4.2                         | 4.0                       | 0.01 | 0            | 0.49                                   | 0.60                                   | 5.6                     | ++ | 0.28                                   | 2.8                     | ++ | 0.50                                   | 4.9                     | ++ | 0.47                                   | 4.6                     | ++ |
| Shrubland                  | zonal                 | 24423 | 0.14       | 100         | 0.29                                                   | 0.30                                                   | 11.5                        | 5.8                       | 0.00 | 0            | 0.41                                   | 0.40                                   | 4.2                     | +  | 0.08                                   | 0.9                     |    | 0.30                                   | 3.4                     | +  | 0.27                                   | 3.0                     |    |
| Shrubland                  | zonal                 | 30196 | 0.23       | 100         | 0.40                                                   | 0.50                                                   | 10.0                        | 4.2                       | 0.06 | 0            | -0.08                                  | -0.20                                  | -1.9                    | +  | -0.31                                  | -2.5                    | ++ | -0.24                                  | -2.0                    | +  | -0.25                                  | -2.2                    | +  |
| Shrubland                  | zonal                 | 55968 | 0.15       | 100         | 0.62                                                   | 0.70                                                   | 16.9                        | 2.9                       | 0.02 | 0            | -0.14                                  | -0.20                                  | -2.4                    |    | -0.41                                  | -4.3                    | ++ | -0.27                                  | -2.9                    |    | -0.29                                  | -3.2                    | +  |
| Shrubland                  | zonal                 | 51276 | 0.27       | 100         | 0.68                                                   | 0.70                                                   | 11.8                        | 4.8                       | 0.13 | 0            | -0.03                                  | 0.00                                   | -2.4                    | +  | -0.32                                  | -3.3                    | ++ | -0.10                                  | -2.7                    | +  | -0.13                                  | -2.8                    | +  |
| Shrubland                  | zonal                 | 54027 | 0.22       | 100         | 0.79                                                   | 0.70                                                   | 15.9                        | 7.7                       | 0.06 | 0            | -0.24                                  | -0.20                                  | -2.6                    |    | -0.41                                  | -3.9                    | ++ | -0.27                                  | -2.9                    | +  | -0.29                                  | -3.0                    | +  |
| Shrubland                  | zonal                 | 42713 | 0.16       | 100         | 1.04                                                   | 1.10                                                   | 29.8                        | 14.6                      | 0.23 | 0            | 0.36                                   | 0.24                                   | -6.3                    | ++ | -0.41                                  | -8.7                    | ++ | 0.08                                   | -6.6                    | ++ | 0.02                                   | -6.9                    | ++ |
| Hot Desert                 | crops                 | 32562 | 0.16       | 100         | 0.01                                                   | 0.88                                                   | 23.0                        | 6.5                       | 0.02 | 0            | 0.05                                   | -0.78                                  | -8.5                    | ++ | 0.00                                   | -0.5                    |    | NC                                     |                         |    | -0.78                                  | -8.6                    | ++ |
| Hot Desert                 | zonal                 | 35414 | 0.17       | 100         | 0.00                                                   | 0.00                                                   | 1.8                         | 2.6                       | 0.06 | 0            | 0.01                                   | 0.10                                   | 0.4                     | +  | 0.88                                   | 7.2                     | ++ | 0.10                                   | 0.4                     | +  | 0.10                                   | 0.5                     | +  |
| Hot Desert                 | zonal                 | 37434 | 0.15       | 100         | 0.00                                                   | 0.00                                                   | 1.8                         | 3.7                       | 0.00 | 0            | 0.05                                   | 0.10                                   | 0.6                     | ++ | 0.88                                   | 9.4                     | ++ | 0.10                                   | 0.6                     | ++ | 0.10                                   | 0.7                     | ++ |
| Hot Desert                 | zonal                 | 37938 | 0.15       | 100         | 0.00                                                   | 0.00                                                   | 1.9                         | 2.2                       | 0.00 | 0            | 0.23                                   | 0.30                                   | 2.9                     | ++ | 0.94                                   | 10.4                    | ++ | 0.27                                   | 2.7                     | ++ | 0.30                                   | 2.9                     | ++ |
| Hot Desert                 | zonal                 | 33532 | 0.27       | 100         | 0.03                                                   | 0.10                                                   | 5.2                         | 5.6                       | 0.09 | 0            | 0.33                                   | 0.20                                   | 0.6                     |    | 0.84                                   | 3.7                     | ++ | 0.17                                   | 0.5                     |    | 0.20                                   | 0.7                     |    |
| Hot Desert                 | zonal                 | 29092 | 0.11       | 100         | 0.18                                                   | 0.10                                                   | 9.3                         | 6.4                       | 0.01 | 0            | 0.22                                   | 0.40                                   | 6.7                     | ++ | 0.75                                   | 11.9                    | ++ | 0.33                                   | 5.6                     | ++ | 0.38                                   | 6.4                     | ++ |
| Hot Desert                 | zonal                 | 39958 | 0.28       | 100         | 0.18                                                   | 0.10                                                   | 3.3                         | 4.3                       | 0.11 | 0            | 0.04                                   | 0.20                                   | 0.3                     |    | 0.84                                   | 2.6                     | ++ | 0.17                                   | 0.2                     |    | 0.20                                   | 0.2                     |    |
| Tropical Grassland         | pasture               | 53838 | 0.19       | 100         | 0.11                                                   | 0.10                                                   | 4.0                         | 4.7                       | 0.04 | 0            | 0.37                                   |                                        | NC                      |    | 0.12                                   | 0.8                     |    | 0.31                                   | 2.3                     | ++ | 0.32                                   | 2.4                     | ++ |
| Tropical Grassland         | pasture               | 22059 | 0.11       | 100         | 0.12                                                   | 0.10                                                   | 5.9                         | 3.6                       | 0.01 | 0            | 0.18                                   | 0.20                                   | 2.8                     | +  | 0.02                                   | 0.1                     |    | 0.15                                   | 2.1                     |    | 0.16                                   | 2.1                     | +  |
| Tropical Grassland         | pasture               | 52415 | 0.17       | 100         | 0.14                                                   | 0.10                                                   | 4.1                         | 3.0                       | 0.06 | 0            | 0.42                                   |                                        | NC                      |    | 0.12                                   | 0.8                     |    | 0.31                                   | 2.3                     | ++ | 0.32                                   | 2.3                     | ++ |
| Tropical Grassland         | pasture               | 44589 | 0.39       | 100         | 0.19                                                   | 0.10                                                   | 5.3                         | 5.1                       | 0.03 | 0            | 0.61                                   | 0.60                                   | 1.4                     | ++ | 0.20                                   | 0.5                     |    | 0.48                                   | 1.1                     | ++ | 0.49                                   | 1.2                     | ++ |
| Tropical Woodland, Savanna | pasture               | 40849 | 0.29       | 100         | 0.47                                                   | 0.40                                                   | 7.4                         | 3.1                       | 0.07 | 0            | 0.12                                   | 0.10                                   | -0.3                    |    | -0.20                                  | -1.5                    | +  | -0.01                                  | -0.7                    |    | 0.03                                   | -0.6                    |    |
| Tropical Woodland, Savanna | pasture               | 41633 | 0.38       | 100         | 0.52                                                   | 0.40                                                   | 8.2                         | 7.1                       | 0.06 | 0            | 0.29                                   | 0.50                                   | 0.6                     |    | -0.03                                  | -0.5                    |    | 0.31                                   | 0.2                     |    | 0.36                                   | 0.3                     |    |
| Tropical Woodland, Savanna | pasture               | 51222 | 0.20       | 100         | 0.63                                                   | 0.57                                                   | 12.7                        | 3.2                       | 0.10 | 0            | 0.06                                   | 0.14                                   | -0.9                    |    | -0.27                                  | -3.3                    | ++ | -0.01                                  | -1.7                    |    | 0.03                                   | -1.5                    |    |
| Tropical Woodland, Savanna | pasture               | 49472 | 0.38       | 100         | 0.74                                                   | 0.57                                                   | 6.7                         | 4.7                       | 0.06 | 0            | 0.25                                   | 0.33                                   | 0.1                     |    | -0.19                                  | -1.1                    |    | 0.15                                   | -0.3                    |    | 0.20                                   | -0.2                    |    |
| Tropical Woodland, Savanna | pasture               | 51986 | 0.24       | 100         | 0.74                                                   | 0.57                                                   | 13.3                        | 5.4                       | 0.11 | 0            | 0.06                                   | 0.33                                   | -0.2                    |    | -0.19                                  | -2.7                    | +  | 0.15                                   | -1.1                    |    | 0.20                                   | -0.8                    |    |
| T                          |                       |       |            |             |                                                        |                                                        |                             |                           |      |              |                                        |                                        |                         |    |                                        |                         |    |                                        |                         |    |                                        |                         |    |

| zonal veg.                | reference<br>land use | ID    | <i>fmf</i> | frost<br>cm | NPP <sub>0</sub><br>kg m <sup>2</sup> yr <sup>-1</sup> | NPP <sub>t</sub><br>kg m <sup>2</sup> yr <sup>-1</sup> | C ref.<br>kg/m <sup>2</sup> | HWS D<br>kg/m <sup>2</sup> | Δfmf | Δfrost<br>cm | ΔNPP <sub>0</sub><br>kg/m <sup>2</sup> | ΔNPP <sub>t</sub><br>kg/m <sup>2</sup> | ΔC<br>kg/m <sup>2</sup> | P  | ΔNPP <sub>t</sub><br>kg/m <sup>2</sup> | ΔC<br>kg/m <sup>2</sup> | P  | ΔNPP <sub>t</sub><br>kg/m <sup>2</sup> | ΔC<br>kg/m <sup>2</sup> | P  | ΔNPP <sub>t</sub><br>kg/m <sup>2</sup> | ΔC<br>kg/m <sup>2</sup> | P  |
|---------------------------|-----------------------|-------|------------|-------------|--------------------------------------------------------|--------------------------------------------------------|-----------------------------|----------------------------|------|--------------|----------------------------------------|----------------------------------------|-------------------------|----|----------------------------------------|-------------------------|----|----------------------------------------|-------------------------|----|----------------------------------------|-------------------------|----|
| Tropical Evergreen Forest | plantation            | 45210 | 0.16       | 100         | 1.08                                                   | 0.98                                                   | 39.2                        | 25.3                       | 0.00 | 0            | 0.18                                   | 0.37                                   | 3.9                     |    | -0.36                                  | -4.2                    |    | -0.04                                  | -0.9                    |    | 0.24                                   | 2.4                     |    |
| Tropical Evergreen Forest | plantation            | 44387 | 0.17       | 100         | 1.16                                                   | 0.98                                                   | 27.7                        | 11.3                       | 0.02 | 0            | 0.24                                   | 0.37                                   | 2.7                     |    | -0.36                                  | -4.7                    | +  | -0.04                                  | -1.6                    |    | 0.24                                   | 1.5                     |    |
| Tropical Evergreen Forest | plantation            | 47080 | 0.24       | 100         | 1.22                                                   | 1.21                                                   | 26.8                        | 11.5                       | 0.15 | 0            | 0.12                                   | 0.13                                   | -4.9                    | +  | -0.59                                  | -8.1                    | ++ | -0.27                                  | -6.9                    | ++ | 0.00                                   | -5.4                    | +  |
| Tropical Evergreen Forest | plantation            | 50426 | 0.19       | 100         | 1.37                                                   | 1.21                                                   | 30.9                        | 10.8                       | 0.03 | 0            | 0.03                                   | 0.13                                   | 0.0                     |    | -0.59                                  | -6.9                    | ++ | -0.27                                  | -4.0                    |    | 0.00                                   | -1.1                    |    |
| Tropical Evergreen Forest | wetland               | 44386 | 0.17       | 100         | 1.15                                                   | 0.92                                                   | 31.4                        | 14.9                       | 0.02 | 0            | 0.25                                   | 0.22                                   | 1.6                     |    | -0.30                                  | -7.5                    | ++ | 0.02                                   | -4.6                    | +  | 0.29                                   | -1.8                    |    |
| Tropical Evergreen Forest | zonal                 | 53094 | 0.23       | 100         | 0.68                                                   | 0.70                                                   | 16.5                        | 7.2                        | 0.06 | 0            | 0.72                                   | 0.65                                   | 3.5                     |    | -0.08                                  | -2.0                    |    | 0.24                                   | 0.2                     |    | 0.51                                   | 2.5                     |    |
| Tropical Evergreen Forest | zonal                 | 43225 | 0.15       | 100         | 0.88                                                   | 0.90                                                   | 24.4                        | 9.8                        | 0.23 | 0            | 0.52                                   | 0.45                                   | -4.3                    | ++ | -0.27                                  | -7.5                    | ++ | 0.04                                   | -6.3                    | ++ | 0.32                                   | -4.9                    | ++ |
| Tropical Evergreen Forest | zonal                 | 42237 | 0.24       | 100         | 1.01                                                   | 1.10                                                   | 23.6                        | 9.3                        | 0.14 | 0            | 0.24                                   | 0.25                                   | -3.7                    |    | -0.48                                  | -7.0                    | ++ | -0.16                                  | -5.7                    | ++ | 0.11                                   | -4.3                    | +  |
| Tropical Evergreen Forest | zonal                 | 42714 | 0.17       | 100         | 1.02                                                   | 1.10                                                   | 31.3                        | 14.7                       | 0.22 | 0            | 0.38                                   | 0.25                                   | -6.4                    | ++ | -0.48                                  | -9.9                    | ++ | -0.16                                  | -8.4                    | ++ | 0.11                                   | -7.0                    | ++ |
| Tropical Evergreen Forest | zonal                 | 43762 | 0.21       | 100         | 1.21                                                   | 1.35                                                   | 27.4                        | 3.4                        | 0.05 | 0            | 0.19                                   | 0.00                                   | -1.9                    |    | -0.72                                  | -8.1                    | ++ | -0.40                                  | -5.5                    | +  | -0.13                                  | -2.9                    |    |
| Tropical Evergreen Forest | zonal                 | 44800 | 0.21       | 100         | 1.21                                                   | 1.35                                                   | 29.2                        | 8.9                        | 0.05 | 0            | 0.17                                   | 0.00                                   | -1.8                    |    | -0.72                                  | -8.0                    | ++ | -0.40                                  | -5.4                    | +  | -0.13                                  | -2.9                    |    |
| Tropical Evergreen Forest | zonal                 | 42930 | 0.30       | 100         | 1.35                                                   | 1.35                                                   | 30.3                        | 21.1                       | 0.00 | 0            | 0.05                                   | 0.00                                   | 0.1                     |    | -0.72                                  | -5.1                    | +  | -0.40                                  | -2.9                    |    | -0.13                                  | -0.9                    |    |
| Tropical Evergreen Forest | zonal                 | 43096 | 0.30       | 100         | 1.37                                                   | 1.35                                                   | 37.8                        | 31.7                       | 0.00 | 0            | 0.03                                   | 0.00                                   | 0.1                     |    | -0.72                                  | -4.5                    | +  | -0.40                                  | -2.4                    |    | -0.13                                  | -0.7                    |    |
