# Supplementary material for: Global distribution of soil organic carbon – Part 2: Certainty of changes related to land use and climate
Source: Copernicus journal article supplement (doi:10.5194/soil-1-367-2015), 2015-04-16
Supplement: Supplementary file 3 [file soil-1-367-2015-supplement.zip]

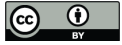

## *Supplement of*

# **Global distribution of soil organic carbon – Part 2: Certainty of changes related to land use and climate**

**M. Köchy et al.**

*Correspondence to:* M. Köchy (office@martinkoechy.de)

- soil-1-367-2015-supplement-cover-letter.pdf
- Supplementary Material
  - File descriptions.txt
  - SM\_1.zip
  - SM\_2.zip
  - SM\_3.pdf
  - SM\_4.pdf
  - SM\_5.pdf
- \_\_MACOSX
  - Supplementary Material
    - \* .\_File descriptions.txt
    - \* .\_SM\_3.pdf
    - \* .\_SM\_4.pdf
    - \* .\_SM\_5.pdf
